# Supplementary material for: Understanding base and backbone contributions of phosphorothioate DNA for molecular recognition with SBD proteins
Source: Royal Society of Chemistry journal article supplement (doi:10.1039/d3cp02820h), 2023-01-01
Supplement: d3cp02820h1.pdf [file d3cp02820h1.pdf]

*Supporting Information*

**Understanding base and backbone contributions of phosphorothioate DNA for molecular recognitions with SBD proteins**

Jiayi Li, Shenggan Luo, Xingyu Ouyang, Geng Wu, Zixin Deng, Xinyi He, Yi-Lei Zhao\*

State Key Laboratory of Microbial Metabolism, Joint International Research Laboratory of Metabolic and Developmental Sciences, School of Life Sciences and Biotechnology, Shanghai Jiao Tong University, Shanghai 200240, China

\*To whom correspondence should be addressed: Prof. Yi-Lei Zhao Tel/Fax: +86-21-34207190;

Email: [yileizhao@sjtu.edu.cn](mailto:yileizhao@sjtu.edu.cn)

## Contents

|                                                                                                              |         |
|--------------------------------------------------------------------------------------------------------------|---------|
| Fig. S1: Chalcogen-binding features in P-S···N <sup>P79</sup> contact .....                                  | S4      |
| Fig. S2: Root mean square deviation ( <i>rmsd</i> ) of 500ns MD trajectories .....                           | S5      |
| Fig. S3: The <i>rmsd</i> of structural alterations for each residue .....                                    | S6      |
| Fig. S4: Overlays of snapshots and co-crystal structures of <b>SBD<i>Spr</i></b> /PT-DNA .....               | S7      |
| Fig. S5: Overlays of snapshots and co-crystal structures of <b>SBD<i>Sco</i></b> /PT-DNA .....               | S8      |
| Fig. S6: The bifurcated hydrogen bonds in bases <b>5'-I</b> ···H102 of <b>SBD<i>Spr</i></b> /PT-DNA .....    | S9      |
| Fig. S7: The bifurcated hydrogen bonds in bases <b>5''-III</b> ···S105 in <b>SBD<i>Spr</i></b> /PT-DNA ..... | S10     |
| Fig. S8: Counter-ions were discharged from <b>SBD</b> /PT-DNA interface .....                                | S11     |
| Fig. S9: Structural analyses of <b>SBD<i>Sco</i></b> -H116Y binding with PT-DNA .....                        | S12     |
| Fig. S10: Structural analyses of <b>SBD<i>Spr</i></b> -Q32R binding with PT-DNA .....                        | S13     |
| Fig. S11: Structural analyses of <b>SBD<i>Spr</i></b> -H102R binding with PT-DNA .....                       | S14     |
| Fig. S12: Structural analyses of <b>SBD<i>Spr</i></b> -G103R binding with PT-DNA .....                       | S15     |
| Fig. S13: Structural analyses of <b>SBD<i>Spr</i></b> -S105R binding with PT-DNA .....                       | S16     |
| Fig. S14: Structural analyses of <b>SBD<i>Spr</i></b> -D104Y binding with PT-DNA .....                       | S17     |
| Fig. S15: Structural analyses of <b>SBD<i>Spr</i></b> -Y31H binding with PT-DNA .....                        | S18     |
| Fig. S16: Structural analyses of <b>SBD<i>Sco</i></b> -R117Q binding with PT-DNA .....                       | S19     |
| Fig. S17: Structural analyses of <b>SBD<i>Sco</i></b> -R190H binding with PT-DNA .....                       | S20     |
| Fig. S18: Structural analyses of <b>SBD<i>Sco</i></b> -R191G binding with PT-DNA .....                       | S21     |
| Fig. S19: Structural analyses of <b>SBD<i>Sco</i></b> -R191S binding with PT-DNA .....                       | S22     |
| Fig. S20: Structural analyses of <b>SBD<i>Sco</i></b> -Y164D binding with PT-DNA .....                       | S23     |
| Fig. S21: Structural analyses of <b>SBD<i>Sco</i></b> -A107N binding with PT-DNA .....                       | S24     |
| Fig. S22: Structural analyses of <b>SBD<i>Sco</i></b> -R188T binding with PT-DNA .....                       | S25     |
| Fig. S23: Stereochemistry of PT-modification at backbones <b>5'-II</b> .....                                 | S26     |
| Fig. S24: Stereochemistry of PT-modification at backbones <b>5'-I</b> .....                                  | S27     |
| Fig. S25: Stereochemistry of PT-modification at backbones <b>3'-I</b> .....                                  | S28     |
| Fig. S26: Stereochemistry of PT-modification at backbones <b>3'-II</b> .....                                 | S29     |
| Fig. S27: Structural analyses of E156 in wild type <b>SBD<i>Sco</i></b> -G <sub>ps</sub> GCC .....           | S30     |
| Fig. S28: Structural analyses of <b>SBD<i>Sco</i></b> -E156K binding with PT-DNA .....                       | S31     |
| Fig. S29: Structural analyses of <b>SBD<i>Sco</i></b> -E156R binding with PT-DNA .....                       | S32     |
| Fig. S30: Structural analyses of <b>SBD<i>Sco</i></b> -E156L binding with PT-DNA .....                       | S33     |
| Fig. S31: Structural analyses of <b>SBD<i>Sco</i></b> -E156D binding with PT-DNA .....                       | S34     |
| Fig. S32: Structural analyses of <b>SBD<i>Sco</i></b> -E156Q binding with PT-DNA .....                       | S35     |
| Table S1: Calculated dV/dλ in the six TI cycles .....                                                        | S36-S41 |
| Table S2: <b>SBD<i>Spr</i></b> interacts with lateral bases .....                                            | S42     |
| Table S3: <b>SBD<i>Sco</i></b> interacts with lateral bases .....                                            | S43     |
| Table S4: Energy contribution of deoxyribose in <b>SBD<i>Spr</i></b> /PT-DNA complex .....                   | S44     |
| Table S5: Energy contribution of deoxyribose in <b>SBD<i>Sco</i></b> /PT-DNA complex .....                   | S45     |
| Table S6: The energy distributions of <b>SBD<i>Spr</i></b> /5'-GGCG <sub>ps</sub> GCCC-3' .....              | S46     |
| Table S7: The energy distributions of <b>SBD<i>Spr</i></b> /5'-GATG <sub>ps</sub> ATCC-3' .....              | S47     |

|                                                                                                                                                                                |         |
|--------------------------------------------------------------------------------------------------------------------------------------------------------------------------------|---------|
| Table S8: The energy distributions of <b>SBD</b> <i>Spr</i> /5'-GGCG <sub>PS</sub> AAC-3' .....                                                                                | S48     |
| Table S9: The energy distributions of <b>SBD</b> <i>Sco</i> /5'-CCG <sub>PS</sub> GCCG-3' .....                                                                                | S49     |
| Table S10: The energy distributions of <b>SBD</b> <i>Sco</i> /5'-CCG <sub>PS</sub> ATCG-3' .....                                                                               | S50     |
| Table S11: The energy distributions of <b>SBD</b> <i>Sco</i> /5'-CCG <sub>PS</sub> AACG-3' .....                                                                               | S51     |
| Table S12: Analysis of consensus sequences in <i>E. coli</i> B7A .....                                                                                                         | S52     |
| Table S13: The pK <sub>1/2</sub> values predicted for the titratable residues in the <b>SBD</b> <i>Spr</i> -5'-GGCG <sub>PS</sub> GCCC-3' system with the H++ web server ..... | S53     |
| Table S14: The pK <sub>1/2</sub> values predicted for the titratable residues in the <b>SBD</b> <i>Spr</i> -5'-GATG <sub>PS</sub> ATCC-3' system with the H++ web server ..... | S54     |
| Table S15: The pK <sub>1/2</sub> values predicted for the titratable residues in the <b>SBD</b> <i>Spr</i> -5'-GGCG <sub>PS</sub> AACC-3' system with the H++ web server ..... | S55     |
| Supplementary methods .....                                                                                                                                                    | S56-S58 |

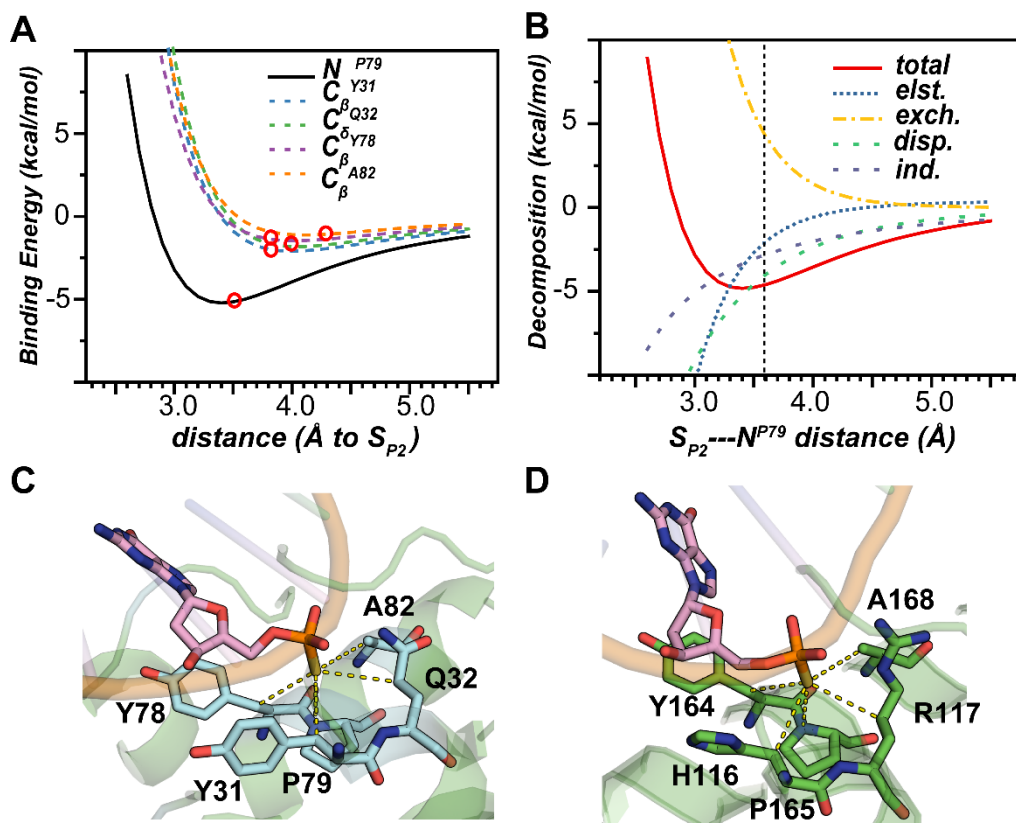

**Fig. S1:** Chalcogen-binding features in  $\text{P-S}\cdots\text{N}^{\text{P79}}$  contact. (A) The binding energy of each contact for the PS moiety is scanned along the heavy atom distances from 2.5 to 5.5 Å. Their real distances in the co-crystal structure are marked with red circles. (B) The  $\text{P-S}\cdots\text{N}^{\text{P79}}$  interaction is further analyzed by SAPT0/jun-cc-pVDZ calculations. Four types were used to categorize intermolecular interactions: electrostatics (*elst.*), exchange (*exch.*), dispersion (*disp.*), and induction (*ind.*). The exchange energy, which was repulsive, was not included in the percentage calculations for the attractive components. Binding pockets of the co-crystal structure of **SBD<sub>Spr</sub>-G<sub>PS</sub>GCC(C)** and **SBD<sub>Sco</sub>-G<sub>PS</sub>GCC(D)**.

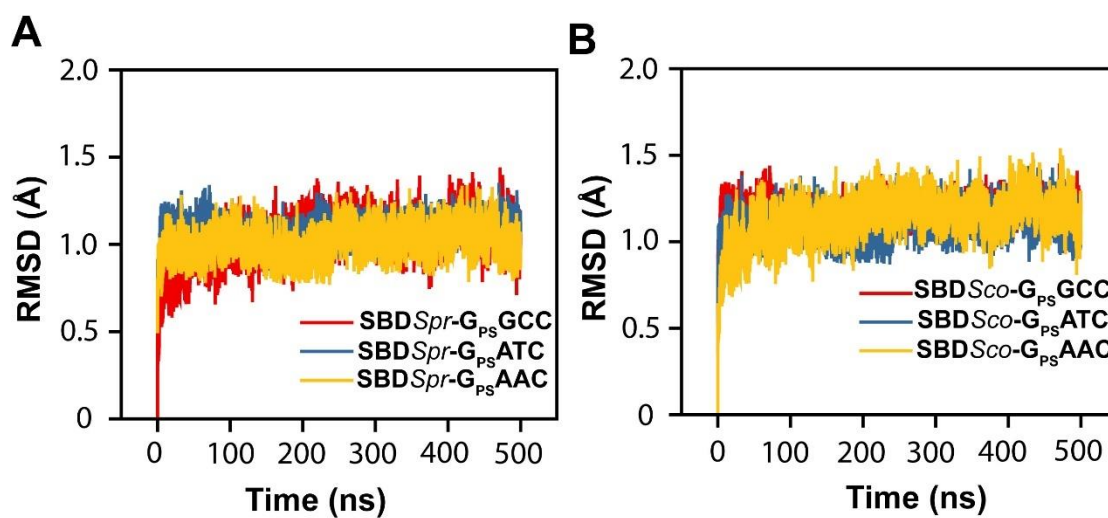

**Fig. S2:** Root mean square deviation (*rmsd*) of 500ns MD trajectories (A) **SBDSpr** binding with 5'-GGCG<sub>ps</sub>GCCC-3', 5'-GATG<sub>ps</sub>ATCC-3', and 5'-GGCG<sub>ps</sub>AACG-3'. (B) **SBDSco** binding with 5'-CCG<sub>ps</sub>GCCG-3', 5'-CCG<sub>ps</sub>ATCG-3', and 5'-CCG<sub>ps</sub>AACG-3'. The stability of the root-mean-square deviation (*rmsd*) values throughout the MD simulation suggests that the trajectories are suitable for further investigations.

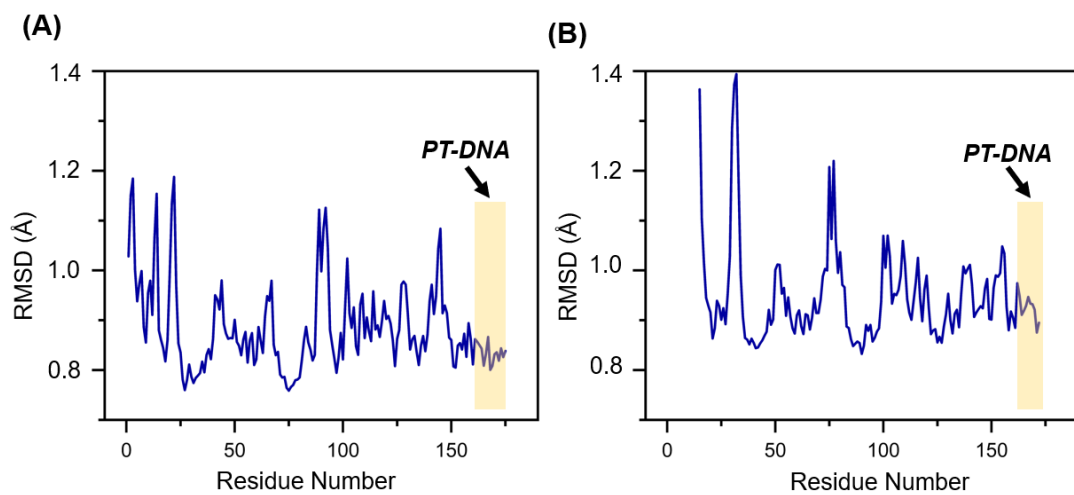

**Fig.S3:** The *rmsd* values in structural alterations for each residue.

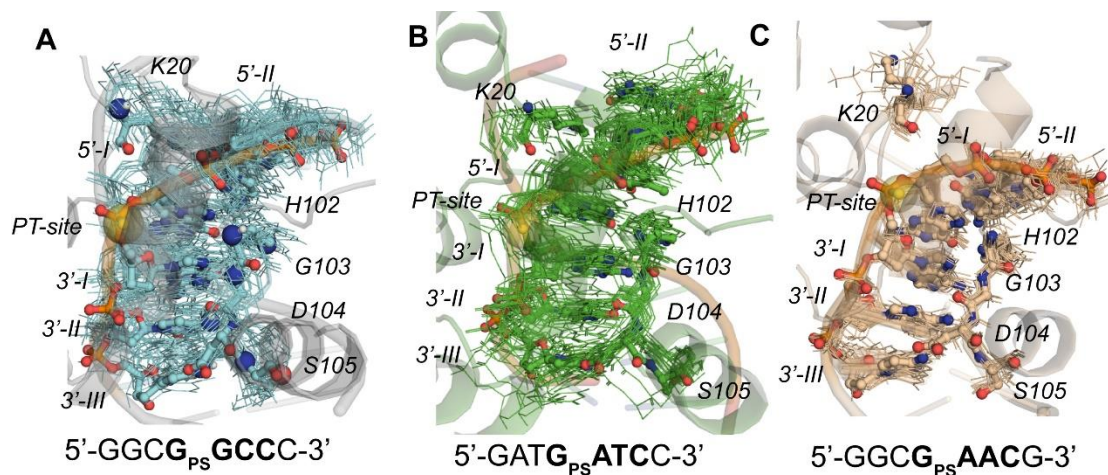

**Fig. S4:** Superposition of dynamic structures and co-crystal structures of *SBDSpr* binding with (A) 5'-GGCG<sub>ps</sub>GCCC-3', (B) 5'-GATG<sub>ps</sub>ATCC-3', and (C) 5'-GGCG<sub>ps</sub>AACG-3'. The geometries of fifty snapshots are randomly extracted from the MD simulations. The co-crystal structures are depicted in stick representation, while the structures in the MD snapshot ensemble are displayed as lines.

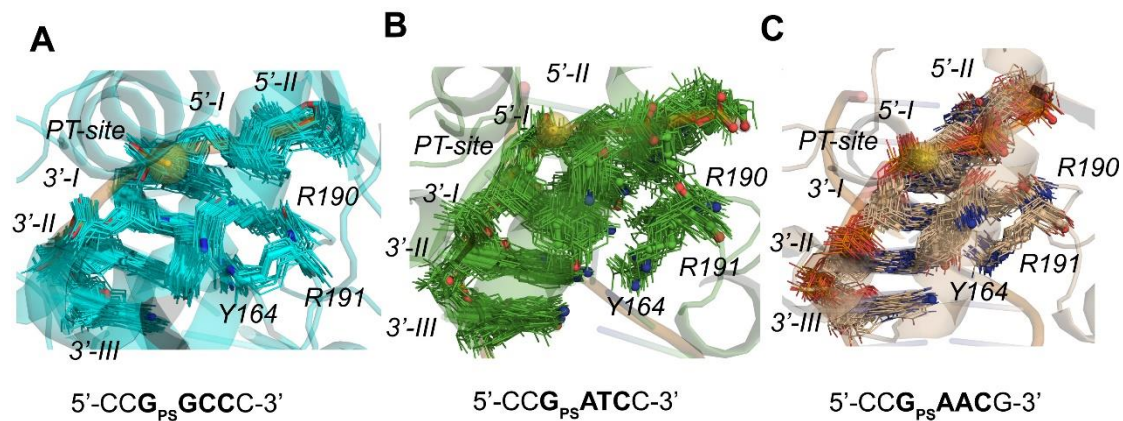

**Fig. S5:** Superposition of dynamic structures and co-crystal structures of **SBDsco** binding with (A) 5'-CCG<sub>ps</sub>GCCG-3' (B) 5'-CCG<sub>ps</sub>ATCC-3' and (C) 5'-CCG<sub>ps</sub>AACG-3'. The geometries of fifty snapshots are randomly extracted from of the MD simulation. The co-crystal structures are depicted in stick representation, while the structures in the MD snapshot ensemble are displayed as lines.



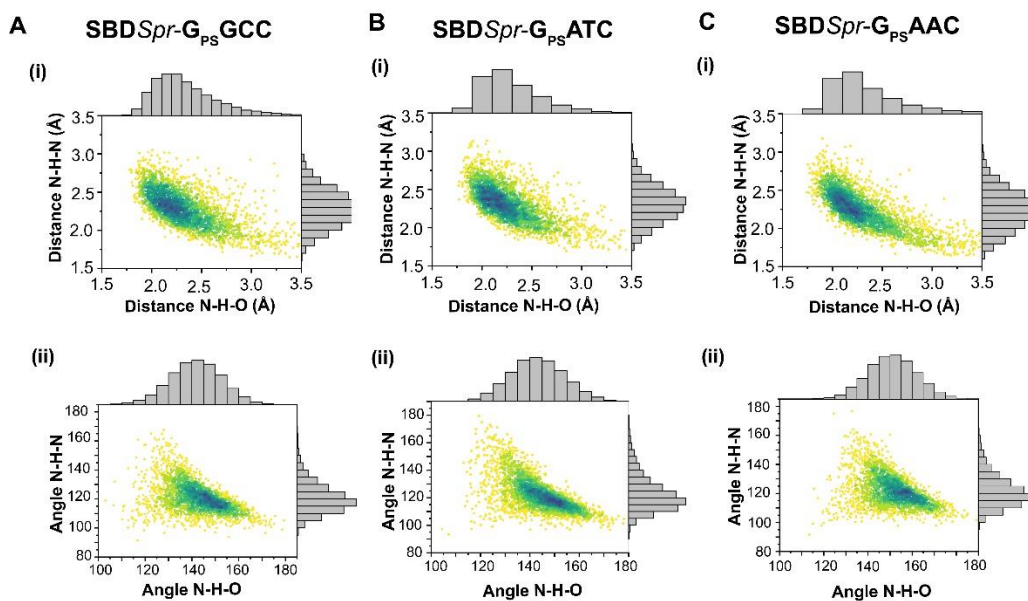

**Fig. S6:** The bifurcated hydrogen bonds formed between H102 imidazole rings (HB donors) and guanine O6, N7 atoms of bases 5'-*I* (HB acceptors) in *SBDSpr* bound with (A) 5'-GGCGPsGCCC-3' (B) 5'-GATGPsATCC-3' and (C) 5'-GGCGPsAACG-3'. (i) distance and (ii) angle of  $N_{\delta}-H \cdots N7$  and  $N_{\delta}-H \cdots O6$  were sampled during the MD simulations. The population density was represented on the map with dark blue indicating the most populated areas and yellow for less populated areas.

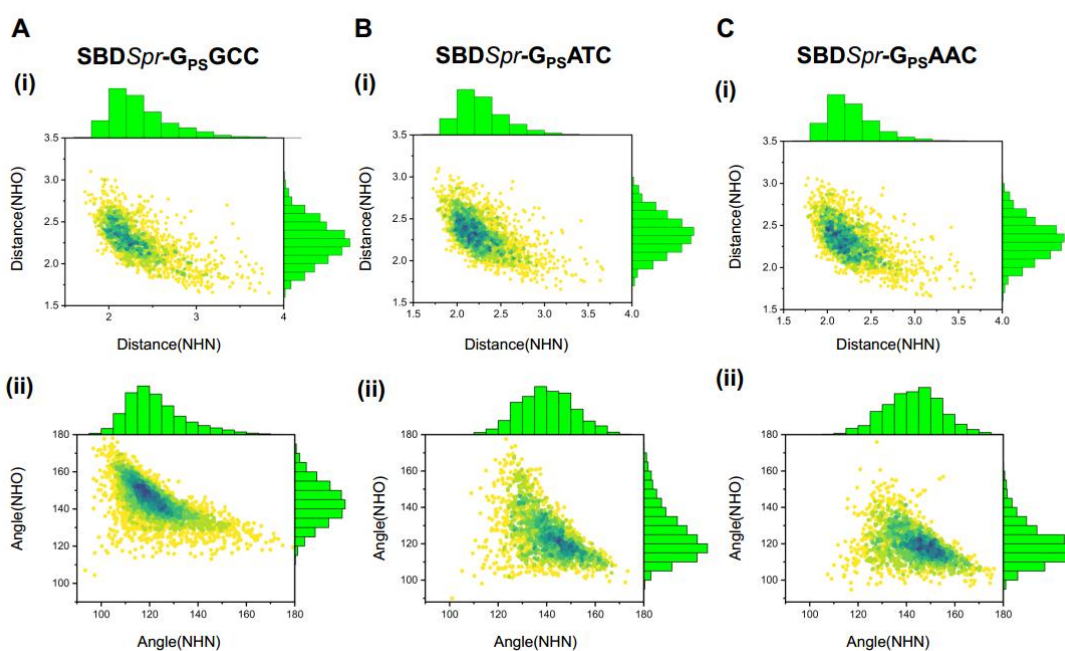

**Fig. S7:** The bifurcated hydrogen bonds between bases *5''-III* and S105 in *SBDSpr* bound with (A) 5'-GGCG<sub>Ps</sub>GCCC-3' (B) 5'-GATG<sub>Ps</sub>ATCC-3' and (C) 5'-GGCG<sub>Ps</sub>AACG-3'. The hydrogen bonds were formed between main chain's N atoms of S105 (HB donors) and guanine O6, N7 atoms of *5''-III* (HB acceptors). (i) distance and (ii) angle of N-H···N7 and N-H···O6 were sampled during the MD simulations. The population density was represented on the map with dark blue indicating the most populated areas and yellow for less populated areas.

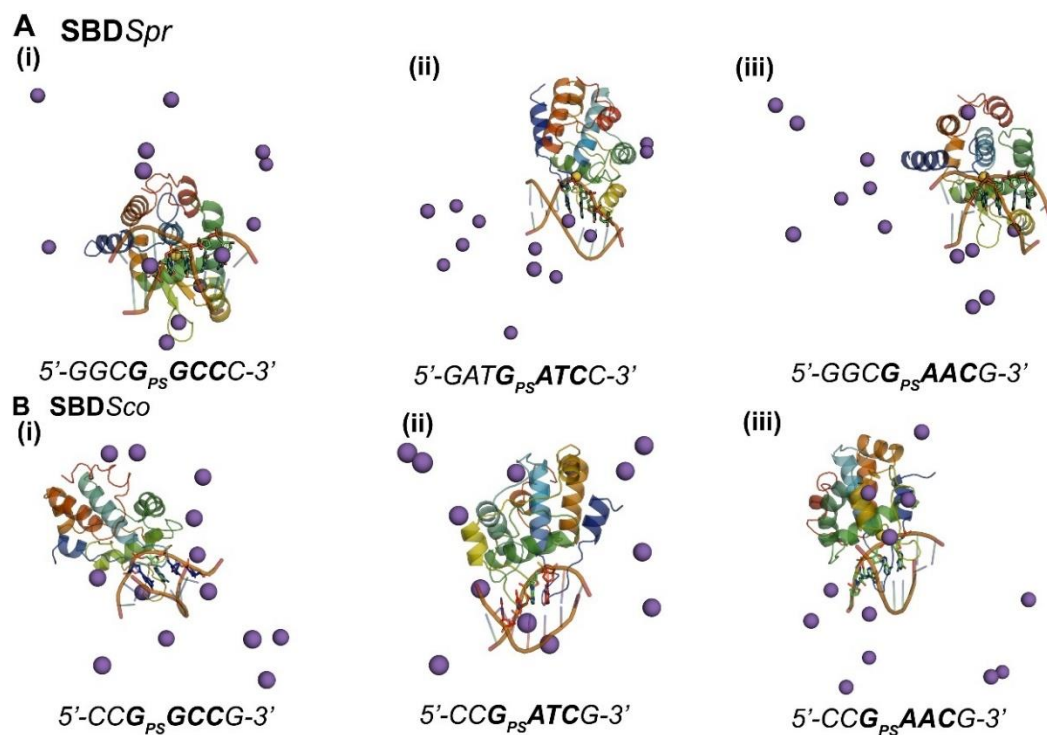

**Fig. S8:** Counter-ions were discharged from the **SBD/PT-DNA** interface, including the representative structures of (A) **SBD<sub>Spr</sub>** binding (i) 5'-GGCG<sub>pS</sub>GCCC-3', (ii) 5'-GATG<sub>pS</sub>ATCC-3', and (iii) 5'-GGCG<sub>pS</sub>AACG-3', and (B) **SBD<sub>Sco</sub>** binding with (i) 5'-CCG<sub>pS</sub>GCCG-3', (ii) 5'-CCG<sub>pS</sub>ATCG-3', and (iii) 5'-CCG<sub>pS</sub>AACG-3'.

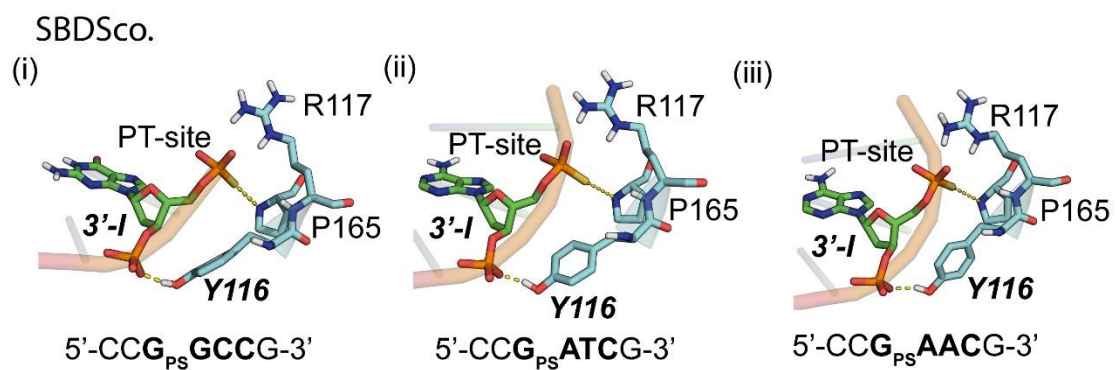

**Fig. S9:** Conformational dynamics analysis for **SBDSco** mutant H116Y binding with PT-DNA. The representative structures of **SBDSco** binding with (i) 5'-CCG<sub>ps</sub>GCCG-3', (ii) 5'-CCG<sub>ps</sub>ATCG-3', and (iii) 5'-CCG<sub>ps</sub>AACG-3' based on cluster analysis of the MD trajectories.

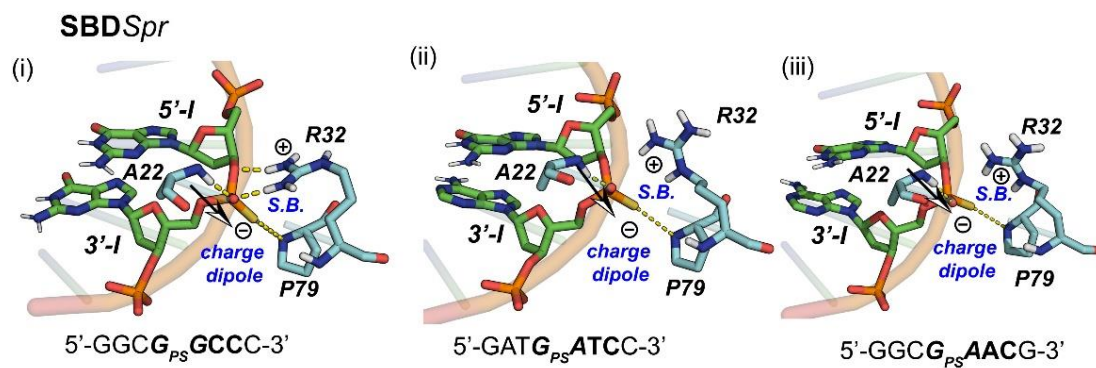

**Fig.S10:** Conformational dynamics analysis for *SBDSpr* mutant Q32R binding with PT-DNA. The representative structures of *SBDSpr* binding with (i) 5'-GGCG<sub>ps</sub>GCCC-3', (ii) 5'-GATG<sub>ps</sub>ATCC-3', and (iii) 5'-GGCG<sub>ps</sub>AACG-3' based on cluster analysis of the MD trajectories.

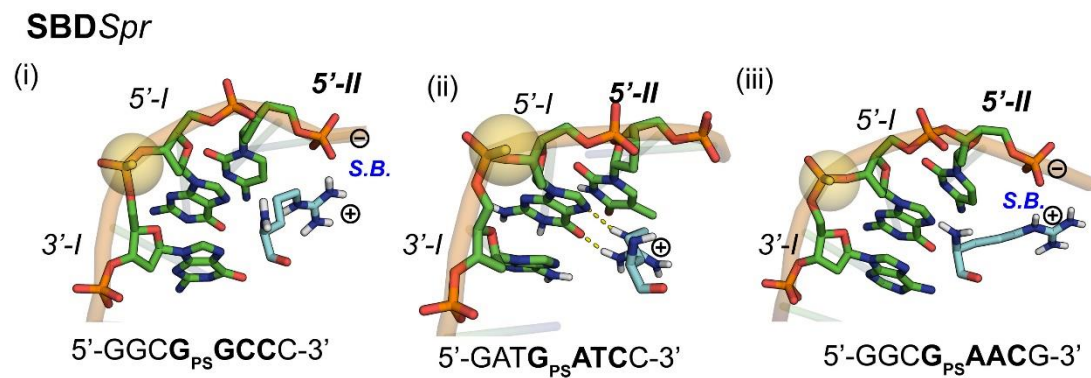

**Fig. S11:** Conformational dynamics analysis for **SBD<sub>Spr</sub>** mutant H102R binding with PT-DNA. The representative structures of **SBD<sub>Spr</sub>** binding with (i) 5'-GGCG<sub>Ps</sub>GCCC-3', (ii) 5'-GATG<sub>Ps</sub>ATCC-3', and (iii) 5'-GGCG<sub>Ps</sub>AACG-3' based on cluster analysis of the MD trajectories.

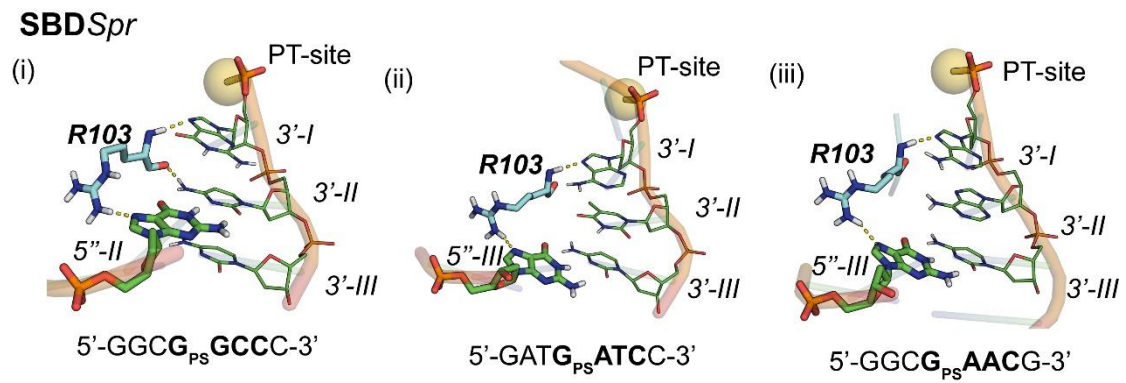

**Fig. S12:** Conformational dynamics analysis for *SBDSpr* mutant G103R binding with PT-DNA. The representative structures of *SBDSpr* binding with (i) 5'-GGCG<sub>ps</sub>GCCC-3', (ii) 5'-GATG<sub>ps</sub>ATCC-3', and (iii) 5'-GGCG<sub>ps</sub>AACG-3' based on cluster analysis of the MD trajectories.

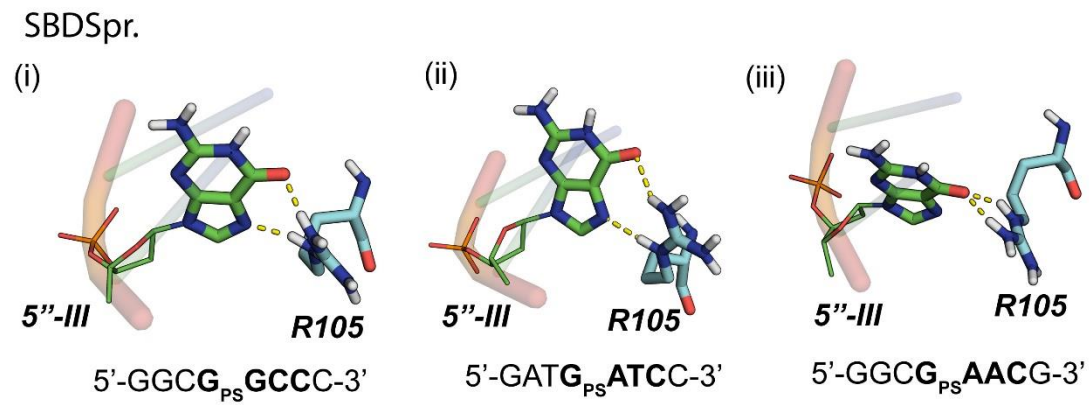

**Fig. S13:** Conformational dynamics analysis for *SBDSpr* mutant S105R binding with PT-DNA. The representative structures of *SBDSpr* binding with (i) 5'-GGCG<sub>PS</sub>GCCC-3', (ii) 5'-GATG<sub>PS</sub>ATCC-3', and (iii) 5'-GGCG<sub>PS</sub>AACG-3' based on cluster analysis of the MD trajectories.



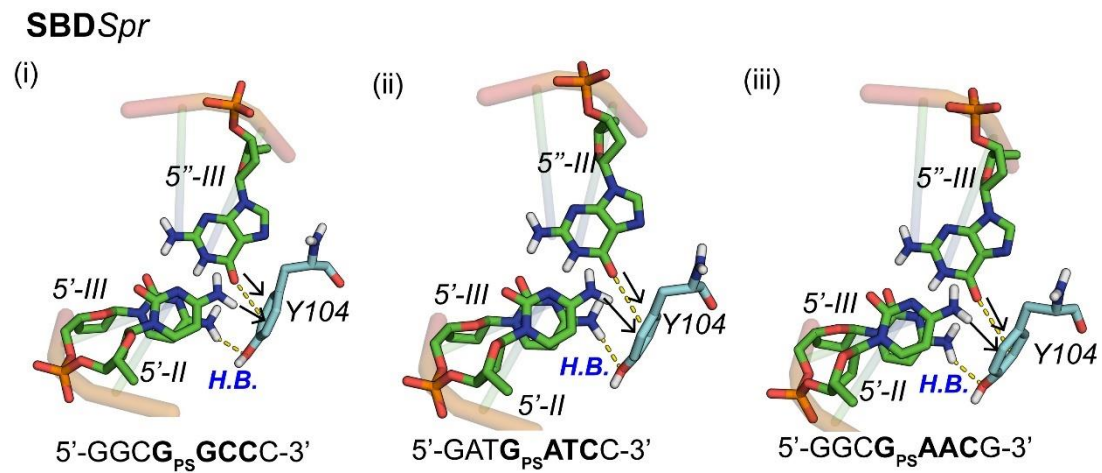

**Fig. S14:** Conformational dynamics analysis for *SBDSpr* mutant D104Y binding with PT-DNA. The representative structures of *SBDSpr* binding with (i) 5'-GGCG<sub>ps</sub>GCCC-3', (ii) 5'-GATG<sub>ps</sub>ATCC-3', and (iii) 5'-GGCG<sub>ps</sub>AACG-3' based on cluster analysis of the MD trajectories. The black arrows represent the T-shaped  $\pi$ - $\pi$  interactions formed between the base groups and the phenyl rings of Y104.

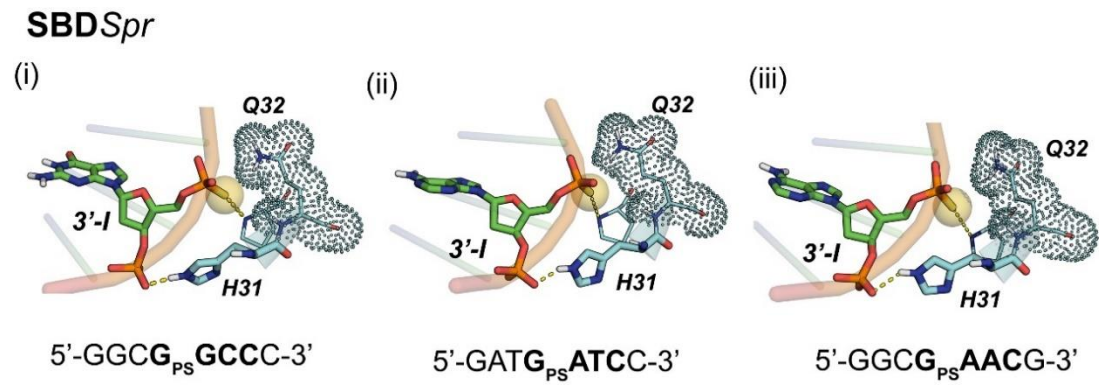

**Fig. S15:** Conformational dynamics analysis for **SBDSpr** mutant Y31H binding with PT-DNA. The representative structures of **SBDSpr** binding with (i) 5'-GGCG<sub>ps</sub>GCCC-3', (ii) 5'-GATG<sub>ps</sub>ATCC-3', and (iii) 5'-GGCG<sub>ps</sub>AACG-3' based on cluster analysis of the MD trajectories.

SBD*Sc*o.

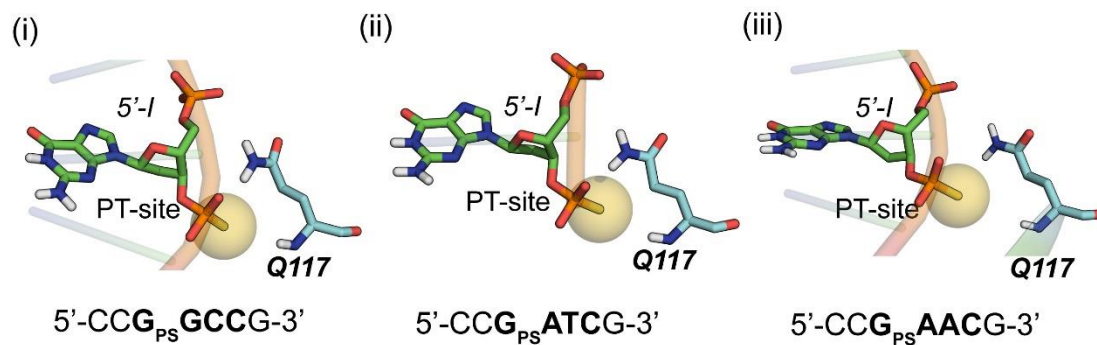

**Fig. S16:** Conformational dynamics analysis for **SBD*Sc*o** mutant R117Q binding with PT-DNA. The representative structures of **SBD*Sc*o** binding with (i) 5'-CCG<sub>ps</sub>GCCG-3', (ii) 5'-CCG<sub>ps</sub>ATCG-3', and (iii) 5'-CCG<sub>ps</sub>AACG-3' based on cluster analysis of the MD trajectories.

SBD*Sco*.

(i)

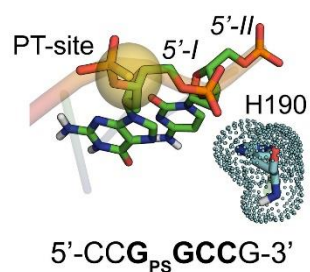

(ii)

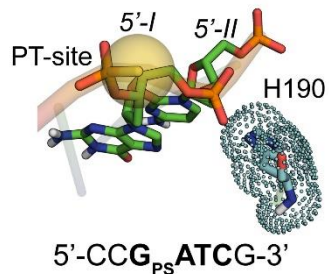

(iii)

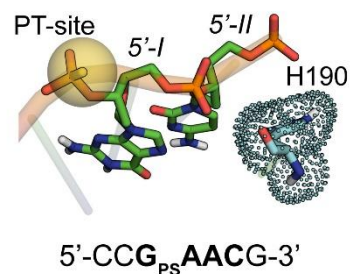

**Fig. S17:** Conformational dynamics analysis for **SBD*Sco*** mutant R190H binding with PT-DNA. The representative structures of **SBD*Sco*** binding with (i) 5'-CCG<sub>ps</sub>GCCG-3', (ii) 5'-CCG<sub>ps</sub>ATCG-3', and (iii) 5'-CCG<sub>ps</sub>AACG-3' based on cluster analysis of the MD trajectories.

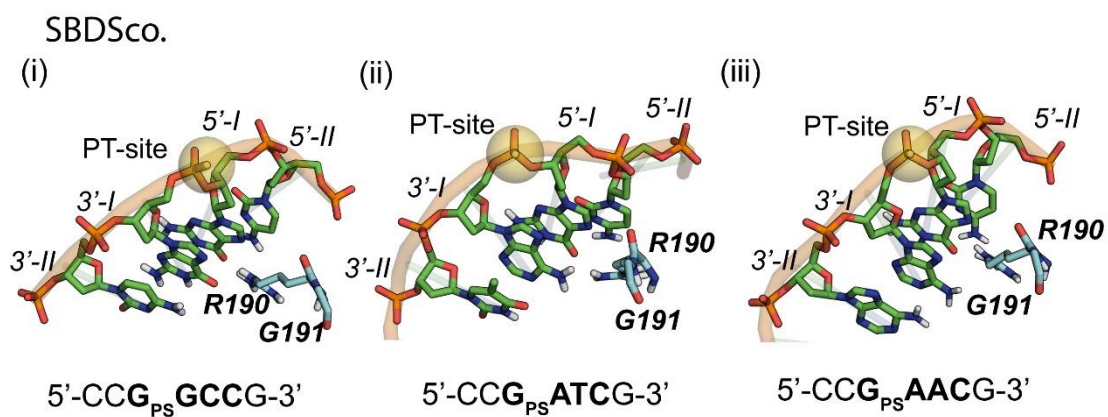

**Fig.S18:** Conformational dynamics analysis for **SBD*Sc*o** mutant R191G binding with PT-DNA. The representative structures of **SBD*Sc*o** binding with (i) 5'-CCG<sub>ps</sub>GCCG-3', (ii) 5'-CCG<sub>ps</sub>ATCG-3', and (iii) 5'-CCG<sub>ps</sub>AACG-3' based on cluster analysis of the MD trajectories.

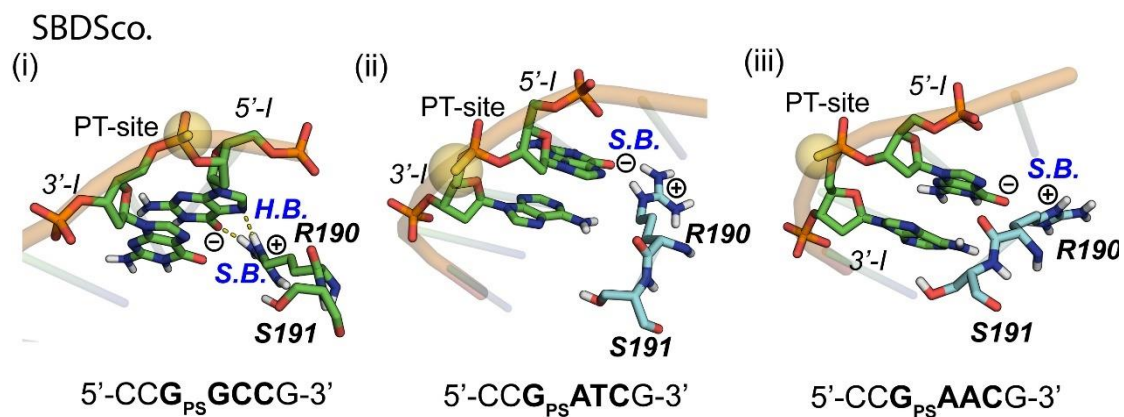

**Fig.S19:** Conformational dynamics analysis for **SBD*Sc*o** mutant R191S binding with PT-DNA. The representative structures of **SBD*Sc*o** binding with (i) 5'-CCG<sub>ps</sub>GCCG-3', (ii) 5'-CCG<sub>ps</sub>ATCG-3', and (iii) 5'-CCG<sub>ps</sub>AACG-3' based on cluster analysis of the MD trajectories.

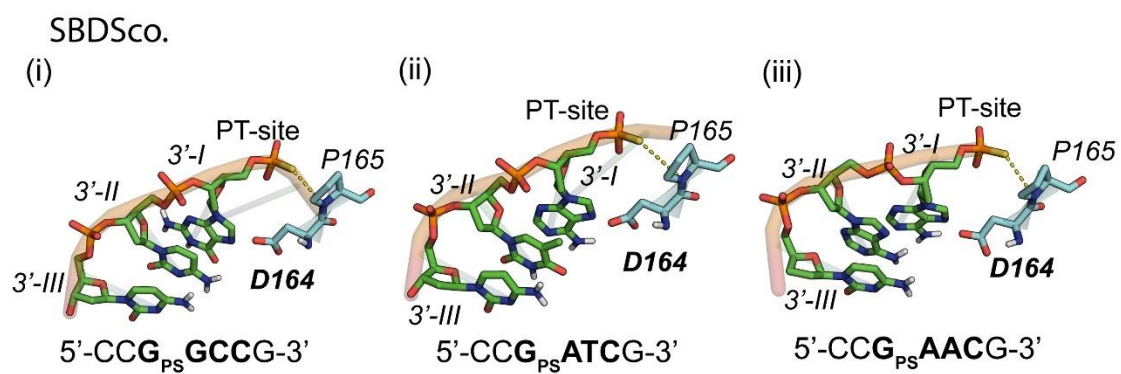

**Fig. S20:** Conformational dynamics analysis for **SBDSco** mutant Y164D binding with PT-DNA. The representative structures of **SBDSco** binding with (i) 5'-CCG<sub>ps</sub>GCCG-3', (ii) 5'-CCG<sub>ps</sub>ATCG-3', and (iii) 5'-CCG<sub>ps</sub>AACG-3' based on cluster analysis of the MD trajectories.

SBDSco.

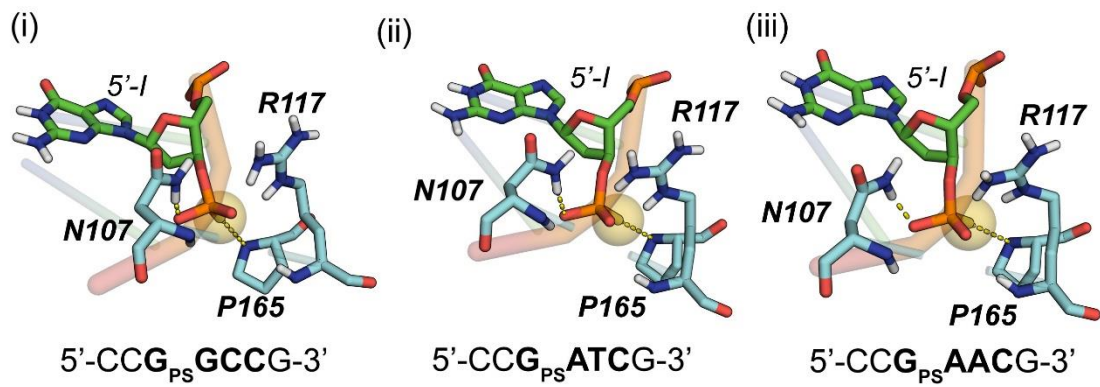

**Fig.S21:** Conformational dynamics analysis for **SBDSco** mutant A107N binding with PT-DNA. The representative structures of **SBDSco** binding with (i) 5'-CCG<sub>ps</sub>GCCG-3', (ii) 5'-CCG<sub>ps</sub>ATCG-3', and (iii) 5'-CCG<sub>ps</sub>AACG-3' based on cluster analysis of the MD trajectories.



SBD*Sc*o.

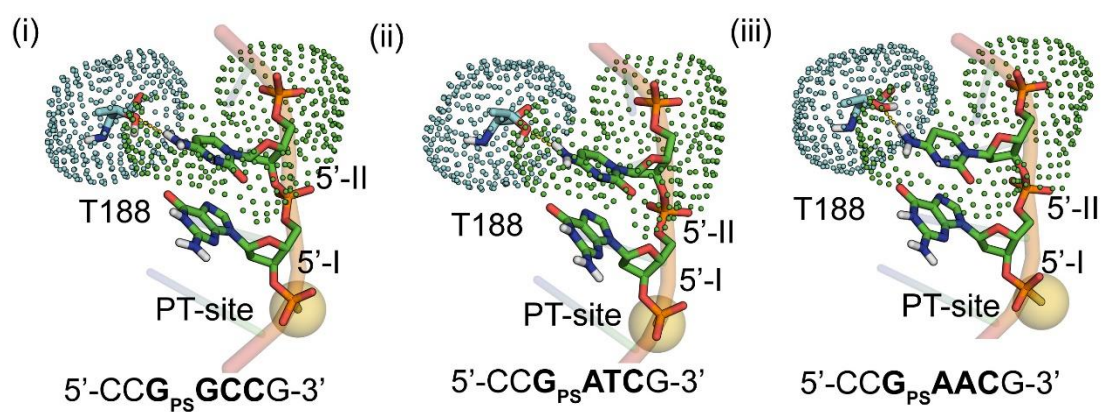

**Fig. S22:** Conformational dynamics analysis for **SBD*Sc*o** mutant R188T binding with PT-DNA. The representative structures of **SBD*Sc*o** binding with (i) 5'-CCG<sub>ps</sub>GCCG-3', (ii) 5'-CCG<sub>ps</sub>ATCG-3', and (iii) 5'-CCG<sub>ps</sub>AACG-3' based on cluster analysis of the MD trajectories.

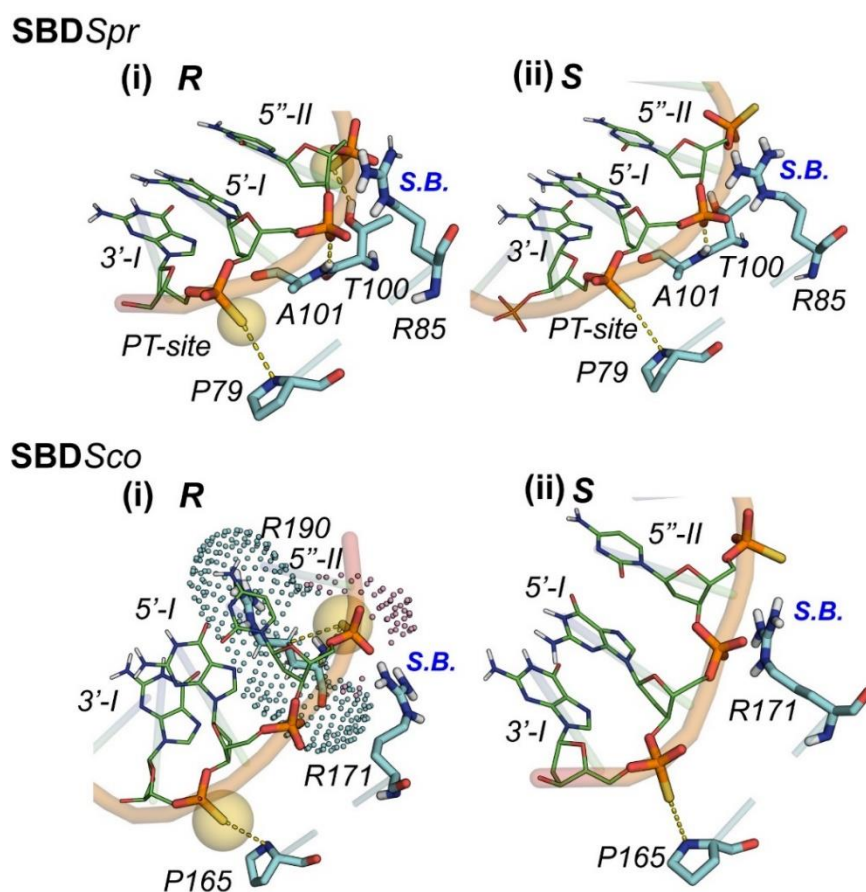

**Fig. S23:** Stereochemistry of PT-modification at backbones  $5''\text{-II}$  in SBD/PT-DNA. The representative structures of (A) **SBD<sub>Spr</sub>** and (B) **SBD<sub>Sco</sub>** binding with PT in *Rp* (i) and *Sp* (ii) configurations based on cluster analysis of the MD trajectories.

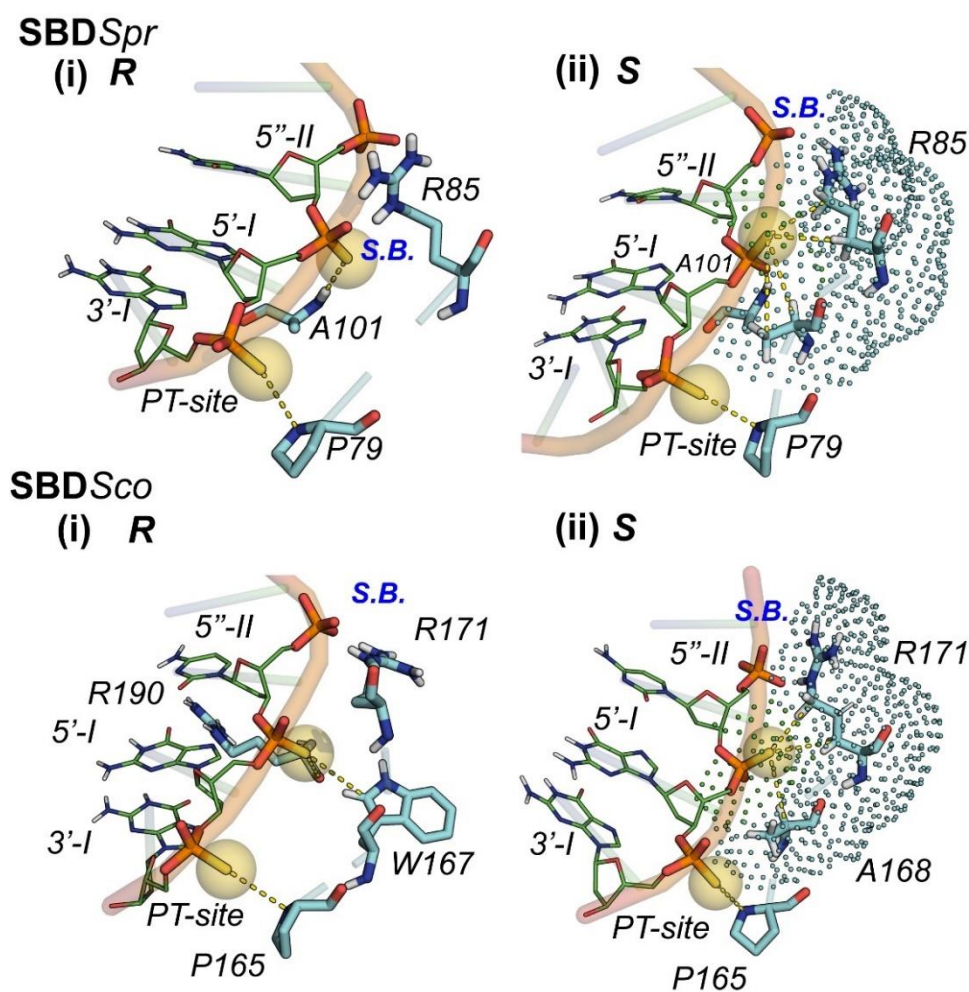

**Fig. S24:** Stereochemistry of PT-modification at backbones  $5'-I$  in SBD/PT-DNA. The representative structures of (A) **SBDSpr** and (B) **SBDSco** binding with PT in *Rp* (i) and *Sp* (ii) configurations based on cluster analysis of the MD trajectories.

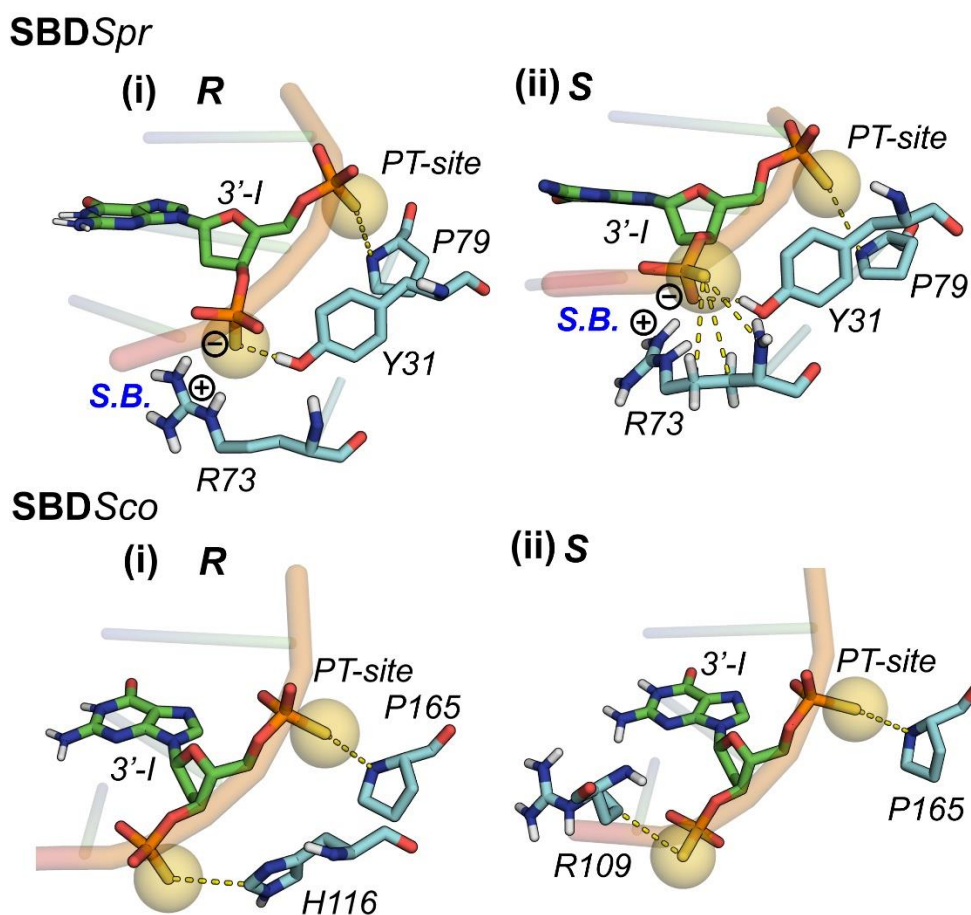

**Fig. S25:** Stereochemistry of PT-modification at backbone  $3'-I$  in **SBD/PT-DNA**. The representative structures of (A) **SBD<sub>Spr</sub>** and (B) **SBD<sub>Sco</sub>** binding with PT in *R<sub>p</sub>* (i) and *S<sub>p</sub>* (ii) configurations based on cluster analysis of the MD trajectories.

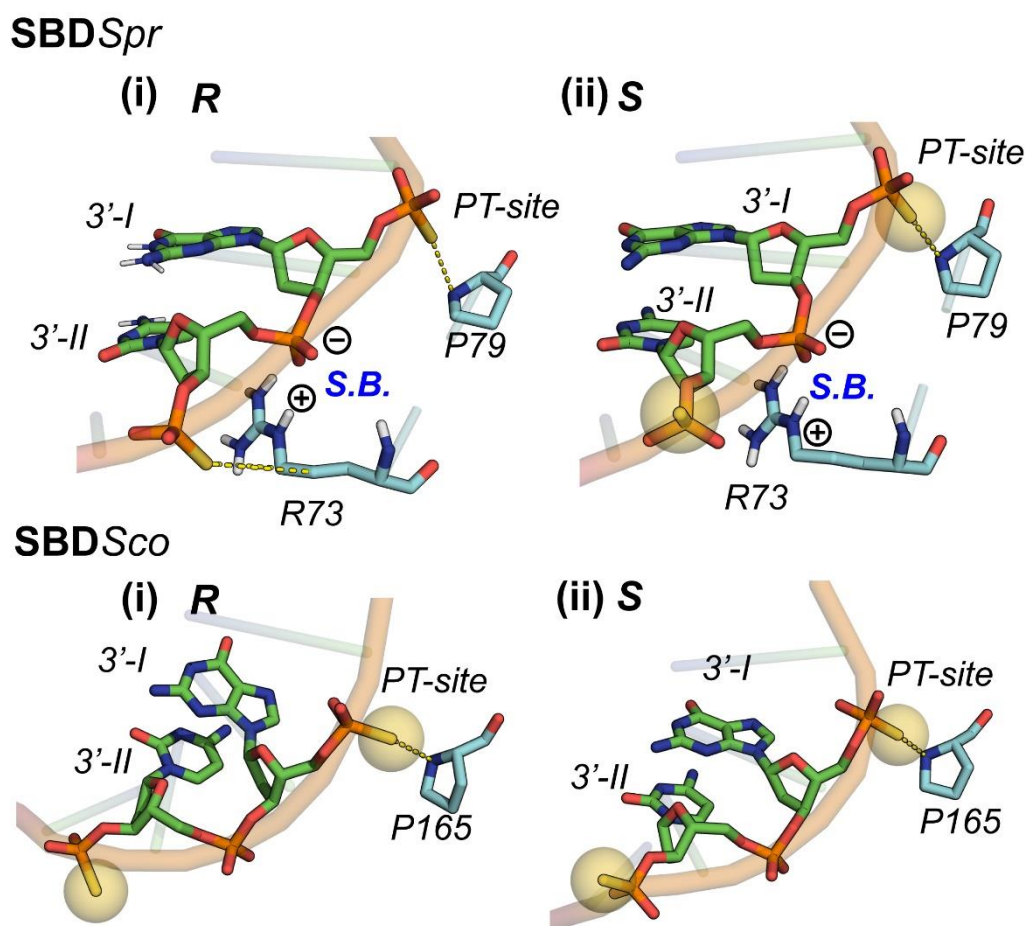

**Fig. S26:** Stereochemistry of PT-modification at backbone 3'-II in SBD/PT-DNA. The representative structures of (A) **SBD<sub>Spr</sub>** and (B) **SBD<sub>Sco</sub>** binding with PT in *R<sub>p</sub>* (i) and *S<sub>p</sub>* (ii) configurations based on cluster analysis of the MD trajectories.

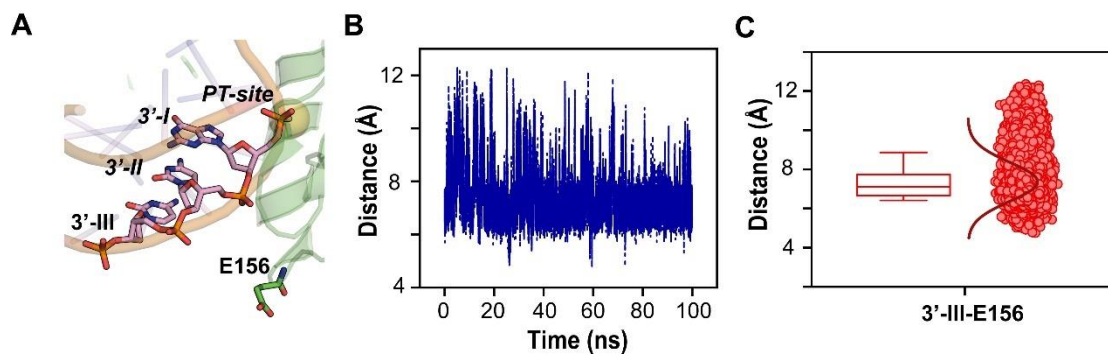

**Fig. S27:** Conformation dynamic analysis of E156 in *SBD<sub>Sco</sub>-GpsGCC* during MD simulations. The representative MD frames of *SBD<sub>Sco</sub>-GpsGCC* complex after cluster analysis of MD trajectories (A). The distances between the E156 and backbone 3'-II were sampled during the MD simulations (B) & (C).



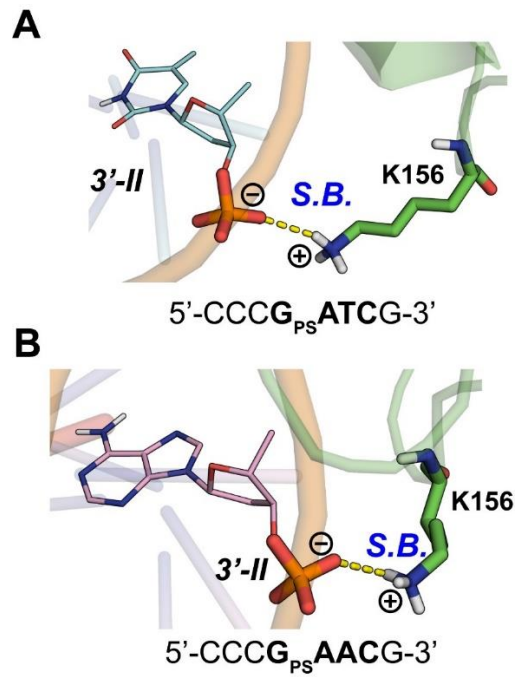

**Fig. S28:** The representative structures of E156K mutant of *SBD<sub>Sco</sub>* binding with PT-DNA (A) 5'-CCG<sub>ps</sub>ATCG-3' and (B) 5'-CCG<sub>ps</sub>AACG-3' during MD simulations. The backbone phosphate segments 3'-II form a salt bridge with K156.

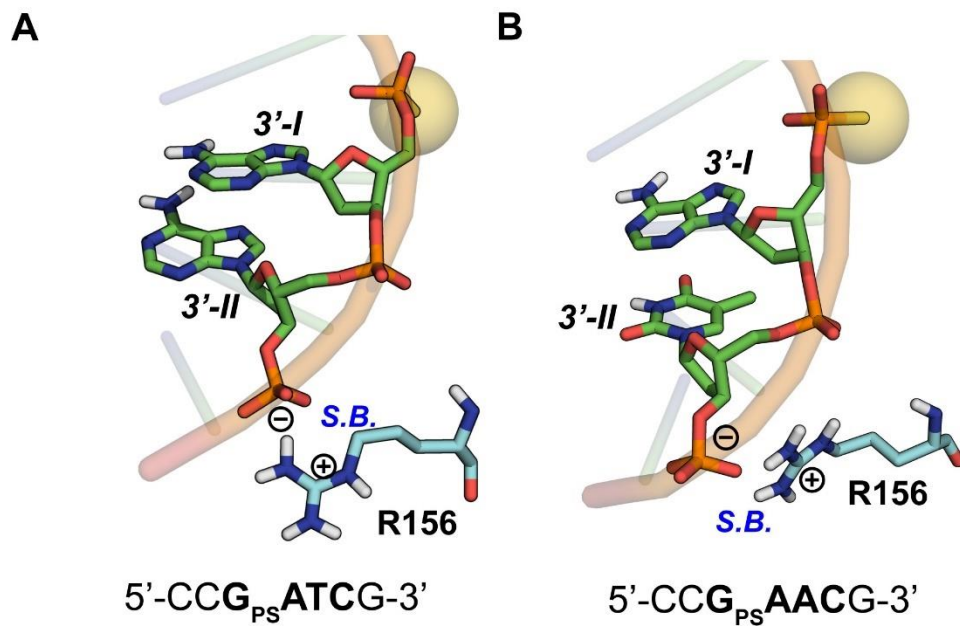

**Fig. S28:** The representative structures of E156R mutant of *SBD<sub>Sco</sub>* binding with PT-DNA (A) 5'-CCG<sub>ps</sub>ATCG-3' and (B) 5'-CCG<sub>ps</sub>AACG-3' during MD simulations. The backbone phosphate segments 3'-II form a salt bridge with R156.



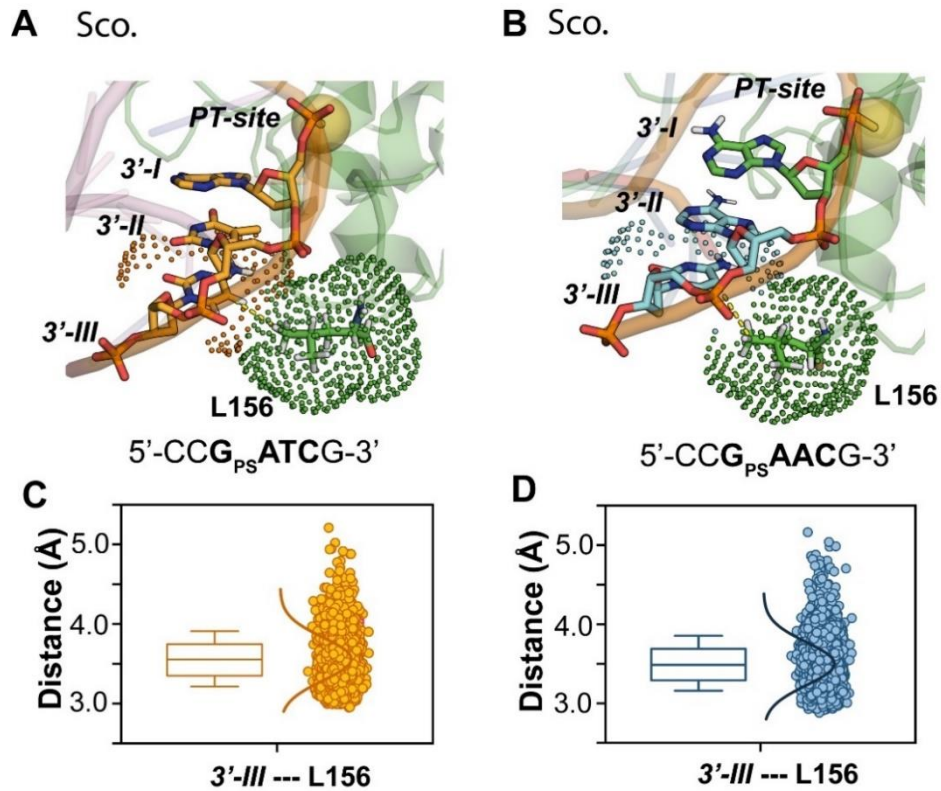

**Fig. S30:** Conformational dynamics SBD<sub>Sco</sub> mutant E156L binding with PT-DNA. (A) and (B) exhibit the representative structures for variant E156L binding with 5'-CCG<sub>Ps</sub>ATCG-3' and 5'-CCG<sub>Ps</sub>AACG-3', respectively. Distributions of distances of C<sub>δ1</sub><sup>L156</sup> and bases 3'-III in (C) E156L-G<sub>Ps</sub>ATC and (D) E156L-G<sub>Ps</sub>AAC, respectively.

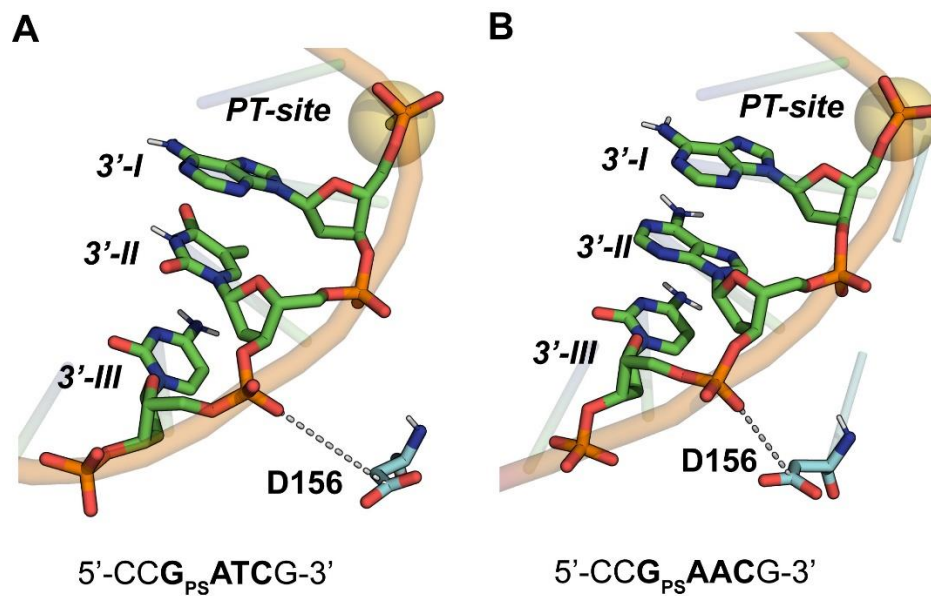

**Fig. S31:** Conformational dynamics *SBD<sub>Sco</sub>* mutant E156D binding with PT-DNA. (A) and (B) exhibit the representative structures for variant E156D binding with 5'-CCG<sub>Ps</sub>ATCG-3' and 5'-CCG<sub>Ps</sub>AACG-3', respectively. The backbone 3'-II and D156 are too distant from each other to form any interaction.

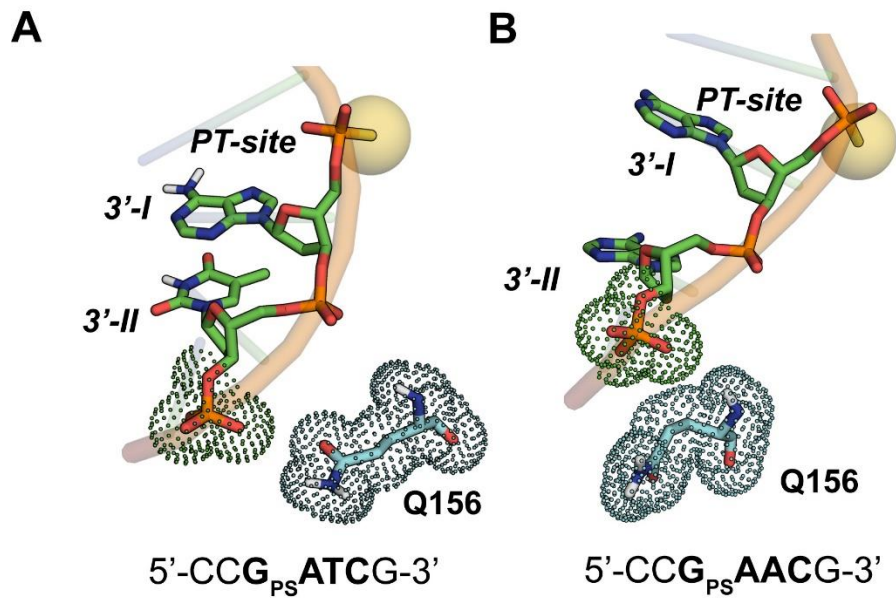

**Fig. S32:** Conformational dynamics *SBD<sub>Sco</sub>* mutant E156Q binding with PT-DNA. (A) and (B) exhibit the representative structures for variant E156Q binding with 5'-CCG<sub>Ps</sub>ATCG-3' and 5'-CCG<sub>Ps</sub>AACG-3', respectively. The backbone 3'-II does not form a specific interaction with Q156.

**Table S1** Calculated  $dV/d\lambda$  in the four TI cycles. Calculated  $dV/d\lambda$  values and errors (deviation) of the 21 curves in the six different thermodynamic cycle in thermodynamic integration (TI) calculation.

(1) Thermodynamic cycle of **SBD***Spr* binding with 5'-GGCG<sub>PS</sub>GCCC-3'.

| Lambda | hemi-modified-<br>G <sub>PS</sub> GCC | Standard<br>deviation | hemi-<br>modified<br><b>SBD</b> <i>Spr</i> -<br>G <sub>PS</sub> GCC | Standard deviation |
|--------|---------------------------------------|-----------------------|---------------------------------------------------------------------|--------------------|
| 0      | 9.9±0.2                               | 4.0                   | 24.7±0.2                                                            | 6.3                |
| 0.05   | 5.6±0.2                               | 4.9                   | 17.8±0.1                                                            | 5.5                |
| 0.10   | 5.8±0.2                               | 3.6                   | 13.1±0.1                                                            | 5.4                |
| 0.15   | 4.5±0.2                               | 4.0                   | 8.1±0.1                                                             | 5.3                |
| 0.20   | 2.2±0.2                               | 3.9                   | 5.9±0.1                                                             | 4.8                |
| 0.25   | 2.1±0.1                               | 3.5                   | 3.8±0.1                                                             | 4.7                |
| 0.30   | 0.5±0.1                               | 3.7                   | -0.6±0.1                                                            | 5.3                |
| 0.35   | -0.5±0.1                              | 3.2                   | -2.1±0.1                                                            | 5.1                |
| 0.40   | -0.7±0.1                              | 2.9                   | -4.9±0.1                                                            | 5.2                |
| 0.45   | -0.8±0.1                              | 2.9                   | -9.9±0.2                                                            | 6.6                |
| 0.50   | -1.9±0.1                              | 2.7                   | -8.5±0.1                                                            | 5.3                |
| 0.55   | -2.0±0.1                              | 2.5                   | -10.1±0.2                                                           | 4.4                |
| 0.60   | -3.1±0.1                              | 2.5                   | -11.8±0.2                                                           | 4.0                |
| 0.65   | -4.9±0.1                              | 3.1                   | -14.6±0.2                                                           | 4.2                |
| 0.70   | -6.6±0.1                              | 2.3                   | -16.3±0.1                                                           | 4.3                |
| 0.75   | -7.4±0.1                              | 2.3                   | -16.9±0.1                                                           | 4.7                |
| 0.80   | -8.7±0.1                              | 2.0                   | -22.7±0.2                                                           | 6.0                |
| 0.85   | -12.9±0.1                             | 3.1                   | -33.0±0.2                                                           | 7.9                |
| 0.90   | -21.5±0.1                             | 3.8                   | -46.6±0.2                                                           | 9.1                |
| 0.95   | -29.7±0.3                             | 3.9                   | -64.3±0.2                                                           | 12.8               |
| 1.00   | -41.4±0.9                             | 6.1                   | -115.1±0.4                                                          | 18.2               |

(2) Thermodynamic cycle of **SBD*Spr*** binding with 5'-GAT**G<sub>PS</sub>ATCC**-3'.

| Lambda | hemi-modified<br>G <sub>PS</sub> ATC | Standard<br>deviation | hemi-<br>modified -<br><b>SBD<i>Spr</i></b> /<br><b>G<sub>PS</sub>ATC</b> | Standard deviation |
|--------|--------------------------------------|-----------------------|---------------------------------------------------------------------------|--------------------|
| 0      | 8.8±0.2                              | 4.9                   | 25.7±0.2                                                                  | 7.1                |
| 0.05   | 6.8±0.2                              | 4.1                   | 18.3±0.1                                                                  | 5.7                |
| 0.10   | 5.9±0.2                              | 4.1                   | 13.6±0.1                                                                  | 5.4                |
| 0.15   | 3.5±0.2                              | 3.5                   | 8.1±0.1                                                                   | 5.3                |
| 0.20   | 3.0±0.2                              | 3.9                   | 5.9±0.1                                                                   | 4.8                |
| 0.25   | 2.9±0.1                              | 3.5                   | 3.3±0.1                                                                   | 5.0                |
| 0.30   | 0.9±0.1                              | 3.7                   | -0.3±0.1                                                                  | 5.3                |
| 0.35   | 0.2±0.1                              | 3.2                   | -4.2±0.1                                                                  | 5.7                |
| 0.40   | -0.7±0.1                             | 2.9                   | -5.3±0.1                                                                  | 5.2                |
| 0.45   | -0.8±0.1                             | 2.9                   | -7.4±0.2                                                                  | 5.6                |
| 0.50   | -2.6±0.1                             | 2.7                   | -10.1±0.1                                                                 | 6.1                |
| 0.55   | -3.3±0.1                             | 2.5                   | -11.2±0.2                                                                 | 4.6                |
| 0.60   | -3.5±0.1                             | 2.5                   | -12.3±0.2                                                                 | 4.4                |
| 0.65   | -3.9±0.1                             | 3.1                   | -13.2±0.2                                                                 | 3.9                |
| 0.70   | -3.9±0.1                             | 2.3                   | -15.7±0.1                                                                 | 4.5                |
| 0.75   | -6.1±0.1                             | 2.3                   | -18.0±0.1                                                                 | 4.9                |
| 0.80   | -8.8±0.1                             | 2.1                   | -22.5±0.2                                                                 | 6.5                |
| 0.85   | -10.9±0.1                            | 2.4                   | -30.0±0.2                                                                 | 8.0                |
| 0.90   | -15.0±0.1                            | 3.2                   | -45.3±0.2                                                                 | 8.5                |
| 0.95   | -22.8±0.3                            | 4.3                   | -66.9±0.2                                                                 | 11.7               |
| 1.00   | -33.9±0.7                            | 7.5                   | -113.0±0.4                                                                | 17.6               |

(3) Thermodynamic cycle of **SBD***Spr* binding with 5'-GGCG<sub>PS</sub>**AACG**-3'.

| Lambda | hemi-modified<br>G <sub>PS</sub> AAC- | Standard<br>deviation | hemi-<br>modified -<br><b>SBD</b> <i>Spr</i> /<br><b>G</b> <sub>PS</sub> <b>AAC</b> | Standard deviation |
|--------|---------------------------------------|-----------------------|-------------------------------------------------------------------------------------|--------------------|
| 0      | 8.5±0.2                               | 4.5                   | 24.8±0.2                                                                            | 6.1                |
| 0.05   | 6.4±0.2                               | 3.9                   | 17.9±0.1                                                                            | 5.5                |
| 0.10   | 5.7±0.2                               | 4.1                   | 12.1±0.1                                                                            | 5.4                |
| 0.15   | 4.5±0.2                               | 3.5                   | 8.4±0.1                                                                             | 5.5                |
| 0.20   | 2.5±0.2                               | 3.7                   | 4.5±0.1                                                                             | 4.8                |
| 0.25   | 2.1±0.1                               | 3.0                   | 1.4±0.1                                                                             | 5.0                |
| 0.30   | 1.4±0.1                               | 3.0                   | -0.3±0.1                                                                            | 5.1                |
| 0.35   | 0.0±0.1                               | 3.5                   | -3.9±0.1                                                                            | 6.6                |
| 0.40   | -0.4±0.1                              | 2.7                   | -4.4±0.1                                                                            | 5.3                |
| 0.45   | -0.9±0.1                              | 2.9                   | -9.3±0.2                                                                            | 6.9                |
| 0.50   | -1.2±0.1                              | 2.7                   | -8.7±0.1                                                                            | 5.0                |
| 0.55   | -2.9±0.1                              | 2.5                   | -11.7±0.2                                                                           | 5.0                |
| 0.60   | -2.6±0.1                              | 2.2                   | -11.8±0.2                                                                           | 4.2                |
| 0.65   | -3.2±0.1                              | 1.8                   | -15.0±0.2                                                                           | 4.5                |
| 0.70   | -5.6±0.1                              | 2.6                   | -14.8±0.1                                                                           | 4.0                |
| 0.75   | -5.7±0.1                              | 2.9                   | -17.0±0.1                                                                           | 5.0                |
| 0.80   | -6.4±0.1                              | 2.3                   | -23.1±0.2                                                                           | 6.0                |
| 0.85   | -9.5±0.1                              | 2.6                   | -32.7±0.2                                                                           | 7.7                |
| 0.90   | -10.6±0.2                             | 2.1                   | -42.3±0.2                                                                           | 9.3                |
| 0.95   | -13.1±0.3                             | 3.5                   | -67.1±0.2                                                                           | 13.2               |
| 1.00   | -25.1±0.5                             | 7.0                   | -116.2±0.4                                                                          | 17.2               |

(4) Thermodynamic cycle of **SBD<sub>Sco</sub>** binding with 5'-CC**G<sub>Ps</sub>**GCCG-3'.

| Lambda | hemi-modified<br><b>G<sub>Ps</sub>GCC</b> | Standard<br>deviation | hemi-<br>modified -<br><b>SBD<sub>Sco</sub></b><br><b>G<sub>Ps</sub>GCC</b> | Standard deviation |
|--------|-------------------------------------------|-----------------------|-----------------------------------------------------------------------------|--------------------|
| 0      | 11.5±0.2                                  | 4.8                   | 25.2±0.2                                                                    | 7.2                |
| 0.05   | 9.4±0.2                                   | 3.9                   | 17.9±0.1                                                                    | 5.5                |
| 0.10   | 8.6±0.2                                   | 4.1                   | 13.1±0.1                                                                    | 5.4                |
| 0.15   | 7.5±0.2                                   | 3.9                   | 8.1±0.1                                                                     | 5.5                |
| 0.20   | 6.8±0.2                                   | 3.2                   | 4.5±0.1                                                                     | 4.8                |
| 0.25   | 3.7±0.1                                   | 3.3                   | 1.4±0.1                                                                     | 5.0                |
| 0.30   | 2.4±0.1                                   | 3.4                   | -0.3±0.1                                                                    | 5.1                |
| 0.35   | 1.2±0.1                                   | 3.1                   | -3.9±0.1                                                                    | 6.6                |
| 0.40   | -0.1±0.1                                  | 2.3                   | -4.4±0.1                                                                    | 5.3                |
| 0.45   | -0.9±0.1                                  | 2.4                   | -9.3±0.2                                                                    | 6.9                |
| 0.50   | -1.2±0.1                                  | 2.8                   | -8.7±0.1                                                                    | 4.8                |
| 0.55   | -2.5±0.1                                  | 2.2                   | -11.7±0.2                                                                   | 5.0                |
| 0.60   | -3.0±0.1                                  | 2.3                   | -11.8±0.2                                                                   | 4.7                |
| 0.65   | -3.2±0.1                                  | 2.1                   | -15.0±0.2                                                                   | 4.1                |
| 0.70   | -5.6±0.1                                  | 2.0                   | -14.8±0.1                                                                   | 3.5                |
| 0.75   | -6.7±0.1                                  | 2.9                   | -17.0±0.1                                                                   | 4.7                |
| 0.80   | -7.4±0.1                                  | 2.3                   | -23.1±0.2                                                                   | 5.7                |
| 0.85   | -8.5±0.1                                  | 2.6                   | -32.7±0.2                                                                   | 7.1                |
| 0.90   | -9.6±0.1                                  | 2.3                   | -42.3±0.2                                                                   | 8.8                |
| 0.95   | -10.1±0.3                                 | 3.8                   | -65.1±0.2                                                                   | 12.8               |
| 1.00   | -17.4±0.7                                 | 6.9                   | -112.4±0.3                                                                  | 15.4               |

(5) Thermodynamic cycle of **SBD<sub>Sc</sub>** binding with 5'-CCG<sub>ps</sub>ATCG-3'.

| Lambda | hemi-modified<br>G <sub>ps</sub> ATC | Standard<br>deviation | hemi-modified<br>SBD <sub>Sc</sub> /G <sub>ps</sub> AT<br>C | Standard deviation |
|--------|--------------------------------------|-----------------------|-------------------------------------------------------------|--------------------|
| 0      | 9.9±0.2                              | 4.5                   | 26.2±0.2                                                    | 6.1                |
| 0.05   | 7.5±0.2                              | 4.4                   | 17.2±0.1                                                    | 5.5                |
| 0.10   | 6.1±0.2                              | 4.1                   | 12.5±0.1                                                    | 5.4                |
| 0.15   | 5.1±0.2                              | 3.6                   | 9.2±0.1                                                     | 5.5                |
| 0.20   | 4.0 ±0.2                             | 3.4                   | 5.2±0.1                                                     | 4.8                |
| 0.25   | 3.1±0.1                              | 2.9                   | 3.4±0.1                                                     | 5.0                |
| 0.30   | 2.4±0.1                              | 3.6                   | -1.3±0.1                                                    | 5.1                |
| 0.35   | 0.9±0.1                              | 3.2                   | -2.7±0.1                                                    | 6.6                |
| 0.40   | -0.2±0.1                             | 2.6                   | -4.1±0.1                                                    | 5.3                |
| 0.45   | -1.1±0.1                             | 3.1                   | -8.2±0.2                                                    | 6.9                |
| 0.50   | -1.6±0.1                             | 2.2                   | -10.7±0.1                                                   | 5.0                |
| 0.55   | -2.2±0.1                             | 2.8                   | -11.2±0.2                                                   | 5.0                |
| 0.60   | -2.5±0.1                             | 2.5                   | -12.8±0.2                                                   | 4.2                |
| 0.65   | -3.7±0.1                             | 2.3                   | -14.0±0.2                                                   | 4.1                |
| 0.70   | -3.8±0.1                             | 3.0                   | -15.9±0.1                                                   | 4.7                |
| 0.75   | -4.7±0.1                             | 3.2                   | -17.0±0.1                                                   | 5.2                |
| 0.80   | -6.5±0.1                             | 3.0                   | -24.1±0.2                                                   | 6.0                |
| 0.85   | -8.0±0.1                             | 2.1                   | -34.7±0.2                                                   | 6.7                |
| 0.90   | -8.8±0.1                             | 2.7                   | -48.3±0.2                                                   | 7.3                |
| 0.95   | -11.5±0.3                            | 3.8                   | -68.3±0.3                                                   | 12.6               |
| 1.00   | -16.1±0.7                            | 6.5                   | -115.8±0.4                                                  | 14.7               |



(6) Thermodynamic cycle of **SBDSco** binding with 5'-CC**G<sub>Ps</sub>**AACG-3'.

| Lambda | hemi-modified<br><b>G<sub>Ps</sub></b> AAC | Standard<br>deviation | hemi-<br>modified<br><b>SBDSco/</b><br><b>G<sub>Ps</sub></b> AAC | Standard<br>deviation |
|--------|--------------------------------------------|-----------------------|------------------------------------------------------------------|-----------------------|
| 0      | 9.5±0.3                                    | 7.9                   | 28.5±0.2                                                         | 10.1                  |
| 0.05   | 6.4±0.3                                    | 5.4                   | 16.8±0.1                                                         | 8.5                   |
| 0.10   | 5.7±0.2                                    | 4.6                   | 12.6±0.1                                                         | 7.4                   |
| 0.15   | 4.5±0.2                                    | 3.8                   | 8.8±0.1                                                          | 6.2                   |
| 0.20   | 2.5±0.2                                    | 3.2                   | 4.4±0.1                                                          | 4.8                   |
| 0.25   | 2.1±0.1                                    | 3.4                   | 1.5±0.1                                                          | 5.0                   |
| 0.30   | 1.7±0.1                                    | 3.6                   | -0.9±0.1                                                         | 5.1                   |
| 0.35   | 0.2±0.1                                    | 3.8                   | -4.0±0.1                                                         | 4.6                   |
| 0.40   | -0.3±0.1                                   | 2.9                   | -4.7±0.1                                                         | 5.5                   |
| 0.45   | -0.7±0.1                                   | 2.7                   | -8.1±0.2                                                         | 4.9                   |
| 0.50   | -1.2±0.1                                   | 2.8                   | -9.9±0.1                                                         | 5.0                   |
| 0.55   | -2.7±0.1                                   | 2.9                   | -12.4±0.2                                                        | 5.1                   |
| 0.60   | -3.6±0.1                                   | 2.4                   | -13.8±0.2                                                        | 4.2                   |
| 0.65   | -4.5±0.1                                   | 2.1                   | -16.0±0.2                                                        | 4.7                   |
| 0.70   | -6.2±0.1                                   | 2.2                   | -17.8±0.1                                                        | 4.3                   |
| 0.75   | -7.7±0.1                                   | 2.9                   | -21.2±0.1                                                        | 5.8                   |
| 0.80   | -9.4±0.1                                   | 3.3                   | -26.1±0.2                                                        | 6.4                   |
| 0.85   | -12.5±0.1                                  | 4.2                   | -30.4±0.2                                                        | 7.3                   |
| 0.90   | -16.9±0.1                                  | 5.4                   | -51.1±0.2                                                        | 8.3                   |
| 0.95   | -18.7±0.2                                  | 5.2                   | -73.2±0.3                                                        | 13.2                  |
| 1.00   | -23.6±0.4                                  | 6.5                   | -112.5±0.4                                                       | 18.5                  |

Table S2: **SBD***Spr* interacts with lateral bases

| Site          | Base type                                                                                 | Residues in SBD              | Distance(Å) | Type of interaction                       |                                                           |
|---------------|-------------------------------------------------------------------------------------------|------------------------------|-------------|-------------------------------------------|-----------------------------------------------------------|
| <b>5'-III</b> | (1) Nε atom of guanine in 5'-GGCG <sub>PS</sub> GCCC-3' and 5'-GGCG <sub>PS</sub> AACG-3' | H102's atom                  | Cε          | 4.1-4.5                                   | hydrophobic                                               |
|               | (2) C2 atom of adenine in in 5'-GATG <sub>PS</sub> ATCC-3'                                |                              |             |                                           |                                                           |
| <b>5'-II</b>  | (1) C2 atom of cytosine 5'-GGCG <sub>PS</sub> GCCC-3' and 5'-GGCG <sub>PS</sub> AACG-3';  | imidazole side chain of H102 |             | 3.3-3.7                                   | π-π stacking                                              |
|               | (2) C5 atom of thymine in 5'-GATG <sub>PS</sub> ATCC-3'                                   |                              |             |                                           |                                                           |
| <b>5'-I</b>   | guanine                                                                                   | H102 aromatic nitrogen atom  |             | 1.9 - 2.3                                 | hydrogen bond                                             |
| <b>3'-I</b>   | N7 atom of guanine and adenine                                                            | nitrogen atom of G103        |             | 1.9 - 2.2                                 | hydrogen bond                                             |
| <b>5''-I</b>  | cytosine N4 of 5'-I<br>thymine O4 of 5''-I                                                | imidazole ring of H102       |             | 4.0-4.4                                   | hydrophobic                                               |
| <b>3'-II</b>  | (1) N4 atom of cytosine in 5'-GGCG <sub>PS</sub> GCCC-3'                                  | oxygen atom of G103          |             | (1) 2.0<br>(2) 2.6<br>(3) 2.5             | (1) hydrogen bond<br>(2)&(3) hydrophobic                  |
|               | (2) C7 atom of thymine in 5'-GATG <sub>PS</sub> ATCC-3'                                   |                              |             |                                           |                                                           |
|               | (3) N6 atom of adenine in 5'-GGCG <sub>PS</sub> AACG-3'                                   |                              |             |                                           |                                                           |
| <b>3'-III</b> | N4 atom of cytosine                                                                       | O <sub>δ</sub> atom of D104  |             | 2.0                                       | hydrogen bond                                             |
| <b>5'-III</b> | (1) complementary strand of 5'-GGCG <sub>PS</sub> GCCC-3' (guanine O6 and N7)             | main chain N-H group of S105 |             | (1) 1.9-2.1<br>(2) 2.0-2.2<br>(3) 3.7-4.2 | (1) hydrogen bond<br>(2) hydrogen bond<br>(3) hydrophobic |
|               | (2) complementary strand of 5'-GATG <sub>PS</sub> ATCG-3' (guanine O6)                    |                              |             |                                           |                                                           |
|               | (3) complementary strand of 5'-GGCG <sub>PS</sub> AACG-3'                                 |                              |             |                                           |                                                           |

Table S3: **SBD***SCO* interacts with lateral bases

| Site           | Base type                                                                                                                                                                               | Residues in SBD                                 | Distance(Å)                         | Type of interaction                                              |
|----------------|-----------------------------------------------------------------------------------------------------------------------------------------------------------------------------------------|-------------------------------------------------|-------------------------------------|------------------------------------------------------------------|
| <b>5'-II</b>   | cytosine                                                                                                                                                                                | guanidyl<br>N <sub>η2</sub> atom of<br>R180     | 3.8-4.1                             | hydrophobic                                                      |
| <b>5'-I</b>    | O6 atom of guanine                                                                                                                                                                      | guanidinium<br>group of<br>R190                 | 1.9 - 2.1                           | hydrogen bond                                                    |
| <b>3'-I</b>    | guanidyl N6 atom of 5'-<br>CCG <u>G</u> psGCCG-3'<br>adenine in 5'-CCGps <u>A</u> ACG-3' or<br>5'-CCGps <u>A</u> TTCG-3'                                                                | R191                                            | 1.9 - 2.2                           | hydrogen bond<br>hydrophobic                                     |
| <b>3'-II</b>   | (1) N4 atom of cytosine in 5'-<br>GGCGps <u>G</u> CCC-3'<br>(2) thymine in 5'-GATGps <u>A</u> TCC-3'<br>(3) N6 atom of adenine in 5'-<br>GGCGps <u>A</u> ACG-3'                         | (1) Y164<br>(2) Y164<br>and R191<br>(3) Y164    | (1) 1.9<br>(2) 2.6 & 2.0<br>(3) 1.9 | hydrogen bond<br>hydrophobic &<br>hydrogen bond<br>hydrogen bond |
| <b>5''-II</b>  | (1) the complementary strand of 5'-<br>CCGps <u>G</u> CCG-3' (guanine O6) and<br>5'-CCGps <u>A</u> ACG-3' (thymine O6)<br>(2) adenine of <b>5''-II</b> in 5'-<br>CCGps <u>A</u> TCCG-3' | R191                                            | 2.0<br>3.3                          | hydrogen bond<br>hydrophobic                                     |
| <b>3'-III</b>  | N4 atom of cytosine                                                                                                                                                                     | Y164                                            | 3.4-3.8                             | hydrophobic                                                      |
| <b>5''-III</b> | guanine N7 of <b>5''-III</b> in 5'-<br>GGCGps <u>G</u> CC-3' and 5'-<br>GATGps <u>A</u> ACG-3'<br>guanine of <b>5''-III</b> in 5'-<br>GGCGps <u>A</u> TCC-3'                            | (1) N <sub>η2</sub> atom<br>of R191<br>(2) R191 | (1) 1.9-2.1<br>(2) 3.7-4.2          | (1) hydrogen<br>bond<br>(2) hydrophobic                          |

Table S4: Binding energy contribution of deoxyribose in **SBD***Spr*/PT-DNA complex

| <b>Deoxyribose</b> | <b>Residue</b> | <b>Contribution</b> |
|--------------------|----------------|---------------------|
| <b>5'-III</b>      |                | negligible          |
| <b>5'-II</b>       | T100           | ~4.8-5.3%           |
| <b>5'-I</b>        | A82            | ~2.3-3.1%           |
| <b>3'-I</b>        | Y31            | ~1.5-2.2%           |
| <b>3'-II</b>       | R29            | ~2.4-3.3 %          |
| <b>3'-III</b>      |                | negligible          |
| <b>Sum</b>         |                | ~11.0-13.9%         |

Table S5: Binding energy contribution of deoxyribose in **SBD***Sco*/PT-DNA complex

| <b>Deoxyribose</b> | <b>Residue</b> | <b>Contribution</b> |
|--------------------|----------------|---------------------|
| <b>5'-III</b>      |                | negligible          |
| <b>5'-II</b>       | R171           | ~4.1-4.7%           |
| <b>5'-I</b>        | A168           | ~2.4-3.2%           |
| <b>3'-I</b>        | Y164, H116     | ~2.9-3.8%           |
| <b>3'-II</b>       | R109           | ~2.1-2.9 %          |
| <b>3'-III</b>      |                | negligible          |
| <b>Sum</b>         |                | ~11.5-14.6%         |

Table S6: The energy distributions of **SBD***Spr*/5'-GGCG<sub>Ps</sub>GCCC-3' (Binding energy in calculation = -14.5 kcal/mol)

| <i>base</i>         | <b>PT-strain</b> | <i>backbone</i> | <b>Complementary</b> |        |
|---------------------|------------------|-----------------|----------------------|--------|
|                     |                  |                 | <i>base</i>          |        |
|                     |                  | ~0.4%           |                      |        |
| <b>5'-III</b>       | ~0.9%            | ~1.1%           |                      |        |
| <b>5'-II</b>        | ~1.8%            | <b>~14.8%</b>   |                      |        |
| <b>5'-I</b>         | ~8.9%            | <b>~16.2%</b>   |                      |        |
|                     |                  | <b>(PT)</b>     |                      |        |
| <b>3'-I</b>         | ~6.5%            | ~18.9%          | <b>5''-I</b>         | ~4.5%  |
| <b>3'-II</b>        | ~7.8%            | ~3.9%           | <b>5''-II</b>        | ~0.3%  |
| <b>3'-III</b>       | ~6.4%            |                 | <b>5''-III</b>       | ~10.6% |
| <b>4 core bases</b> | ~29.7%           | ~39.0%          |                      |        |

Table S7: The binding energy distributions in the case of **SBD***Spr*/5'-GATG<sub>PS</sub>ATCC-3' (Binding energy in calculation = -13.3 kcal/mol)

| <i>base</i>         | <b>PT-strain</b> | <i>backbone</i> | <b>Complementary</b> |       |
|---------------------|------------------|-----------------|----------------------|-------|
|                     |                  |                 | <i>base</i>          |       |
| <b>5'-III</b>       | ~1.0%            | ~0.5%           |                      |       |
|                     |                  | ~1.5%           |                      |       |
| <b>5'-II</b>        | ~2.1%            | <b>~15.9%</b>   |                      |       |
| <b>5'-I</b>         | ~8.9%            | <b>~18.1%</b>   |                      |       |
|                     |                  | <b>(PT)</b>     |                      |       |
| <b>3'-I</b>         | ~7.0%            | <b>~18.9%</b>   | <b>5''-I</b>         | ~3.6% |
| <b>3'-II</b>        | ~5.2%            | ~3.1%           | <b>5''-II</b>        | ~0.5% |
| <b>3'-III</b>       | ~8.2%            |                 | <b>5''-III</b>       | ~8.0% |
| <b>4 core bases</b> | ~29.3%           | ~40.1%          |                      |       |

Table S8: The binding energy distributions of **SBD*Spr*/5'-GGCG<sub>ps</sub>AACC-3'** (Binding energy in calculation = -12.7 kcal/mol)

| <i>base</i>   | <b>PT-strain</b> | <i>backbone</i> | <b>Complementary</b> |       |
|---------------|------------------|-----------------|----------------------|-------|
|               |                  |                 | <i>base</i>          |       |
|               |                  | ~0.6%           |                      |       |
| <b>5'-III</b> | ~1.1%            | ~1.6%           |                      |       |
| <b>5'-II</b>  | ~2.5%            | <b>~17.0%</b>   |                      |       |
| <b>5'-I</b>   | <b>~10.7%</b>    | <b>~19.2%</b>   |                      |       |
|               |                  | <b>(PT)</b>     |                      |       |
| <b>3'-I</b>   | ~7.4%            | <b>~22.2%</b>   | <b>5''-I</b>         | 3.0%  |
| <b>3'-II</b>  | ~3.0%            | ~2.8%           | <b>5''-II</b>        | ~0.5% |
| <b>3'-III</b> | ~7.8%            |                 | <b>5''-III</b>       | ~3.3% |
| <b>4</b>      | <b>core</b>      | ~28.8%          |                      |       |
| <b>bases</b>  |                  | ~43.2%          |                      |       |



Table S9: The binding energy distributions in the case of **SBD<sub>Sc</sub>/5'-CCG<sub>Ps</sub>GCCG-3'**  
 (Binding energy in calculation = -12.6 kcal/mol)

| <i>base</i>         | <b>PT-strain</b> | <i>backbone</i> | <b>Complementary</b> |            |
|---------------------|------------------|-----------------|----------------------|------------|
|                     |                  |                 | <i>base</i>          |            |
| <b>5'-III</b>       | ~0.3%            | ~0.6%           |                      |            |
|                     |                  | <b>~22.2%</b>   |                      |            |
| <b>5'-II</b>        | ~3.3%            | ~3.7%           |                      |            |
| <b>5'-I</b>         | <b>~15.6%</b>    | <b>~24.2%</b>   |                      |            |
|                     |                  | <b>(PT)</b>     | <b>5''-I</b>         | negligible |
| <b>3'-I</b>         | ~0.6%            | ~4.6%           | <b>5''-II</b>        | ~3.3%      |
| <b>3'-II</b>        | <b>~15.9%</b>    | ~4.4%           | <b>5''-III</b>       | ~4.0%      |
| <b>3'-III</b>       | ~1.0%            |                 |                      |            |
| <b>4 core bases</b> | ~32.1%           | ~33.2%          |                      |            |

Table S10: The binding energy distributions in the case of **SBD<sub>Sco</sub>-5'-CCG<sub>Ps</sub>ATCG-3'** (Binding energy in calculation = -11.4 kcal/mol).

| <i>base</i>         | <b>PT-strain</b> | <i>backbone</i>              | <b>Complementary</b> | <i>base</i> |
|---------------------|------------------|------------------------------|----------------------|-------------|
|                     |                  | ~0.6%                        |                      |             |
| <b>5'-III</b>       | ~0.3%            | <b>~20.0%</b>                |                      |             |
| <b>5'-II</b>        | ~3.0%            | ~3.5%                        |                      |             |
| <b>5'-I</b>         | <b>~15.6%</b>    | <b>~21.8%</b><br><b>(PT)</b> |                      |             |
| <b>3'-I</b>         | ~8.1%            | ~4.2%                        | <b>5''-I</b>         | ~4.2%       |
| <b>3'-II</b>        | ~4.5%            | ~5.4%                        | <b>5''-II</b>        | ~0.6%       |
| <b>3'-III</b>       | ~8.4%            |                              | <b>5''-III</b>       | ~9.3%       |
| <b>4 core bases</b> | ~36.6%           | ~31.4%                       |                      |             |

Table S11. The binding energy distributions in the case of **SBD<sub>Sc</sub>**-5'-CCG<sub>PS</sub>AACG-3' (Binding energy in calculation = -11.8 kcal/mol).

| <i>base</i>         | <b>PT-strain</b> | <i>backbone</i> | <b>Complementary</b> | <i>base</i> |
|---------------------|------------------|-----------------|----------------------|-------------|
|                     |                  | ~0.6%           |                      |             |
| <b>5'-III</b>       | ~0.5%            | <b>~19.4%</b>   |                      |             |
| <b>5'-II</b>        | ~2.4%            | ~3.8%           |                      |             |
| <b>5'-I</b>         | <b>~11.3%</b>    | <b>~22.0%</b>   |                      |             |
|                     |                  | <b>(PT)</b>     |                      |             |
| <b>3'-I</b>         | ~8.0%            | ~4.8%           | <b>5''-I</b>         | ~4.2%       |
| <b>3'-II</b>        | ~4.5%            | ~5.2%           | <b>5''-II</b>        | ~0.6%       |
| <b>3'-III</b>       | ~8.3%            |                 | <b>5''-III</b>       | ~9.2%       |
| <b>4 core bases</b> | ~32.2%           | ~32.0%          |                      |             |

Table S12: Analysis of upstream bases of 360 PT-modifications 5'-G<sub>PS</sub>AAC-3'/5'-G<sub>PS</sub>TTC-3' with a frequency higher than 30% in *E. coli* B7A.

|              |              | <i>5'-III</i>      |                    |                    |                   |              |
|--------------|--------------|--------------------|--------------------|--------------------|-------------------|--------------|
|              |              | <b>A</b>           | <b>C</b>           | <b>G</b>           | <b>T</b>          | <b>TOTAL</b> |
| <i>5'-II</i> | <b>A</b>     | (41/360)<br>11.39% | (39/360)<br>10.83% | (45/360)<br>12.50% | (5/360)<br>1.39%  | 36.11%       |
|              | <b>C</b>     | (19/360)<br>5.28%  | (25/360)<br>6.94%  | (32/360)<br>8.89%  | (9/360)<br>2.50%  | 23.61%       |
|              | <b>G</b>     | (48/360)<br>13.33% | (24/360)<br>6.67%  | (29/360)<br>8.06%  | (18/360)<br>5.00% | 33.06%       |
|              | <b>T</b>     | (6/360)<br>1.67%   | (13/360)<br>3.61%  | (5/360)<br>1.39%   | (2/360)<br>0.56%  | 7.22%        |
|              | <b>TOTAL</b> | 31.67%             | 28.06%             | 30.83%             | 9.44%             | 100.00%      |

**Table S13.** The pK<sub>1/2</sub> values predicted for the titratable residues in the **SBDSpr-5'-GGCGpsGCC-3'** system with the H++ web server

| Residue | pK <sub>1/2</sub> | Residue       | pK <sub>1/2</sub> | Residue | pK <sub>1/2</sub> |
|---------|-------------------|---------------|-------------------|---------|-------------------|
| Asp7    | 2.4               | Asp55         | 3.3               | Asp104  | 2.5               |
| Arg8    | >12.0             | Asp57         | 4.6               | Arg108  | >12.0             |
| Glu10   | 4.4               | Glu58         | 10.4              | Glu113  | 4.1               |
| Asp11   | >12.0             | Lys65         | 12.0              | Arg115  | >12.0             |
| Asp14   | 3.1               | Arg66         | 7.0               | Glu122  | 3.1               |
| Asp15   | 5.2               | His67         | >12.0             | His125  | 5.2               |
| Arg17   | >12.0             | Arg70         | 2.9               | Asp126  | 1.1               |
| Lys20   | 11.7              | Glu72         | 12.0              | His129  | 7.1               |
| Arg23   | >12.0             | Arg73         | 6.1               | Arg130  | >12.0             |
| Arg29   | >12.0             | Arg75         | >12.0             | His133  | 6.6               |
| Tyr31   | >12.0             | Asp77         | 1.3               | Arg135  | >12.0             |
| Arg42   | >12.0             | Tyr78         | >12.0             | Glu140  | 5.1               |
| Arg44   | >12.0             | His84         | 6.1               | Tyr146  | >12.0             |
| Arg45   | >12.0             | Arg85         | 12.0              | Asp151  | 3.3               |
| Glu47   | 2.1               | Glu92         | 3.8               | Glu157  | 5.0               |
| Arg49   | >12.0             | His94         | 5.9               | Asp158  | 1.5               |
| Arg55   | 3.3               | Glu97         | 4.4               | Tyr162  | 10.8              |
| Asp49   | >12.0             | <b>His102</b> | <b>10.5</b>       |         |                   |

**Table S14.** The pK<sub>1/2</sub> values predicted for the titratable residues in the **SBDSpr-5'-GATGpsATCC -3'** system with the H++ web server

| Residue | pK <sub>1/2</sub> | Residue       | pK <sub>1/2</sub> | Residue | pK <sub>1/2</sub> |
|---------|-------------------|---------------|-------------------|---------|-------------------|
| Asp7    | 1.4               | Asp55         | 3.5               | Asp104  | 1.9               |
| Arg8    | >12.0             | Asp57         | 2.6               | Arg108  | >12.0             |
| Glu10   | 4.0               | Glu58         | 4.2               | Glu113  | 4.3               |
| Asp11   | 2.6               | Lys65         | 10.5              | Arg115  | >12.0             |
| Asp14   | >12.0             | Arg66         | >12.0             | Glu122  | 3.5               |
| Asp15   | >12.0             | His67         | 6.5               | His125  | 4.7               |
| Arg17   | >12.0             | Arg70         | >12.0             | Asp126  | 2.6               |
| Lys20   | >12.0             | Glu72         | 3.1               | His129  | 6.5               |
| Arg23   | >12.0             | Arg73         | >12.0             | Arg130  | >12.0             |
| Arg29   | >12.0             | Arg75         | >12.0             | His133  | 6.2               |
| Tyr31   | >12.0             | Asp77         | 1.9               | Arg135  | >12.0             |
| Arg42   | >12.0             | Tyr78         | >12.0             | Glu140  | 4.4               |
| Arg44   | >12.0             | His84         | 6.9               | Tyr146  | >12.0             |
| Arg45   | >12.0             | Arg85         | >12.0             | Asp151  | 3.3               |
| Glu47   | 2.2               | Glu92         | 3.3               | Glu157  | 5.0               |
| Arg49   | >12.0             | His94         | 4.8               | Asp158  | 2.5               |
| Arg55   | 3.5               | Glu97         | 4.1               | Tyr162  | 10.8              |
| Asp49   | >12.0             | <b>His102</b> | <b>8.3</b>        |         |                   |

**Table S15.** The pK<sub>1/2</sub> values predicted for the titratable residues in the **SBDSpr-5'-GGCGPsAACG-3'** system with the H++ web server

| Number | pK(1/2) | Number        | pK(1/2)     | Number | pK(1/2) |
|--------|---------|---------------|-------------|--------|---------|
| Asp7   | 2.6     | Asp55         | 2.9         | Asp104 | 1.4     |
| Arg8   | >12.0   | Asp57         | 2.6         | Arg108 | >12.0   |
| Glu10  | 4.3     | Glu58         | 4.6         | Glu113 | 4.6     |
| Asp11  | 1.6     | Lys65         | 10.3        | Arg115 | 11.7    |
| Asp14  | >12.0   | Arg66         | >12.0       | Glu122 | 3.2     |
| Asp15  | >12.0   | His67         | 6.7         | His125 | 5.3     |
| Arg17  | >12.0   | Arg70         | >12.0       | Asp126 | 1.3     |
| Lys20  | 10.7    | Glu72         | 3.3         | His129 | 6.8     |
| Arg23  | >12.0   | Arg73         | >12.0       | Arg130 | >12.0   |
| Arg29  | >12.0   | Arg75         | >12.0       | His133 | 6.6     |
| Tyr31  | >12.0   | Asp77         | 1.9         | Arg135 | >12.0   |
| Arg42  | >12.0   | Tyr78         | >12.0       | Glu140 | 4.3     |
| Arg44  | >12.0   | His84         | 6.0         | Tyr146 | >12.0   |
| Arg45  | >12.0   | Arg85         | >12.0       | Asp151 | 3.4     |
| Glu47  | 2.2     | Glu92         | 3.4         | Glu157 | 5.1     |
| Arg49  | >12.0   | His94         | 5.3         | Asp158 | 1.9     |
| Arg55  | 2.9     | Glu97         | 4.4         | Tyr162 | 10.7    |
| Asp49  | >12.0   | <b>His102</b> | <b>10.1</b> |        |         |

## SUPPLEMENTARY METHOD

### Alchemical Binding Free Energy Calculation details

We explored the alchemical transformations of PT-DNA into normal DNA via sulfur-oxygen swaps. The relative binding free energies were calculated from equilibrium simulations using thermodynamic integration (TI) formulations with Bennett Acceptance Ratio (BAR) and its multistate generalization (MBAR)(1-3). The free energy differences were calculated by gradually perturbing from one to another in a series of discrete steps, represented by  $\lambda$  values. A series of artificial states, parametrized by  $\lambda$ , connecting the unmodified and modified forms, were created by interpolating the force field parameters. We used the notation that  $\lambda = 0$  corresponds to unmodified states (normal DNA) and  $\lambda = 1$  corresponds to modified states (PT-DNA). The basic free energy protocol will be a three-step protocol with a decharging step of A, transformation of (partially) discharged A to (partially) discharged B, and finally recharging of B. First, the atoms in the softcore region (those atoms that will transform into dummy atoms) are fully discharged. Next, these discharged atoms undergo a LJ transformation using softcore potentials, while at the same time the charges of the nonsoftcore atoms are also transformed. Last, the atoms in the softcore region are recharged to the final state. This protocol is generally quite robust, since the softcore LJ transformations occur after the partial charges of the softcore atoms have been eliminated. In total, 21  $\lambda$ -windows for each DNA transformation were performed. Each minimization step consisted of 2000 cycles using the steepest descent method. Afterward, the system was heated from 0 to 300 K gradually over one ns with a coupling restraint of 5 kcal/mol·Å<sup>2</sup> on the solute, followed by equilibration at 300 K using the NPT ensemble for 100 ps with the same restraint. Then another 100 ps of NPT equilibration with a weaker restraint (2 kcal/mol·Å<sup>2</sup>) was performed. Finally, the restraint was released and the system was equilibrated using NPT conditions for 200 ps. With these settings, the simulations successfully finished, and the structures appeared fine after visual inspection. Then a 2 ns NPT production run was performed. A time step of 1 fs is used together with the SHAKE. TI calculations in water were performed with explicit solvent (TIP3P, minimum 12 Å to the box side) and under periodic boundary conditions with PME. The conformation of the **SBD**/PT-DNA was taken from the most populated conformation sampled during standard MD simulation. To improve convergence, “soft-core” potentials were applied to the Lennard-Jones and the Coulombic potentials as implemented in AMBER 18. Both the charge and vdW interactions between the disappearing (or appearing) unique atoms with the surrounding atoms were described by softcore potentials. Softcore atoms are treated in a dual topology fashion, while the other atoms are considered in a single topology. Free energy derivatives ( $\partial V/\partial\lambda$ ) were collected independently for each  $\lambda$  from the production run. In the TI method, the free energy difference is calculated from the integral of  $\partial V(\lambda)/\partial\lambda$  from 0 to 1, where V is the potential energy.



### MM/GBSA binding energy calculation details

The MM/GBSA calculations were performed under IGB=2 and ionic strength of 100 mM, as in the previous literature (4). The binding energies between DNA and protein were calculated with 1000 snapshots extracted from MD trajectories by molecular mechanics/generalized Born surface area (MM/GBSA) approach for binding energy-residue decomposition analysis.

using the following equations:

$$\begin{aligned}\Delta G_{\text{bind}} &= G_{\text{complex}} - (G_{\text{DNA}} + G_{\text{Protein}}), \\ \Delta G_{\text{bind}} &= \Delta H - T \cdot \Delta S \approx \Delta E_{\text{MM}} + \Delta G_{\text{solv}} - T \Delta S, \\ \Delta E_{\text{MM}} &= \Delta E_{\text{int}} + \Delta E_{\text{vdW}} + \Delta E_{\text{ele}}, \\ \Delta G_{\text{solv}} &= \Delta G_{\text{GB}} + \Delta G_{\text{SA}}, \\ \Delta G_{\text{bind}} &= G_{\text{complex}} - (G_{\text{DNA}} + G_{\text{Protein}}),\end{aligned}$$

where  $\Delta E_{\text{int}}$  can be completely canceled because the single trajectory strategy was used for the MM/GBSA calculations. In the current Amber codes, this is taken to be proportional to the total solvent accessible surface area (SA) of the molecule, with a proportionality constant derived from experimental solvation energies of small non-polar molecules, and uses a fast LCPO algorithm:  $\Delta G_{\text{SA}} = \gamma \times \text{SASA} + \beta$ , to compute an analytical approximation to the solvent accessible area of the molecule (5). where the surface tension constants  $\gamma$  and  $\beta$  were set to 0.0072 and 0, respectively. The polar part of the solvation energy ( $\Delta G_{\text{B}}$ ) was estimated using the Generalized Born (GB) model proposed by Onufriev et al. (igb = 2) (6). The  $\Delta E_{\text{vdw}}$ ,  $\Delta E_{\text{ele}}$ ,  $\Delta G_{\text{GB}}$ , and  $\Delta G_{\text{SA}}$  terms were computed based on the 1000 snapshots extracted from the last 50 ns MD trajectories. Results from each trajectory were calculated individually and analyzed statistically. In the per-residue energy decomposition analysis, the contribution of each residue was estimated with  $i_{\text{decomp}} = 2$ , by which the 1-4 EEL interaction energies were added to the electrostatic potential term and the 1-4 VDW interaction energies to the van der Waals potential term.

### Interaction calculation via SAPT methods

Symmetry-Adapted Perturbation Theory (SAPT) method enables direct computation of interaction energy between monomers. Additionally, SAPT calculations can provide an interaction energy decomposition into four different, physically meaningful terms: electrostatic, exchange, induction, and dispersion. We performed energy decomposition and evaluate the interaction energies applying the SAPT method at the SAPT0/jun-ccpVDZ theory using the PSI4 package (7,8).

## Reference:

1. Shirts, M. R.; Chodera, J. D. Statistically Optimal Analysis of Samples from Multiple Equilibrium States. *J. Chem. Phys.* 2008, 129, 124105.
2. Torrie, G. M.; Valleau, J. P. Nonphysical Sampling Distributions in Monte Carlo Free-Energy Estimation: Umbrella Sampling. *J. Comput. Phys.* 1977, 23, 187-199.
3. Shirts, M. R.; Pande, V. S. Comparison of Efficiency and Bias of Free Energies Computed by Exponential Averaging, the Bennett Acceptance Ratio, and Thermodynamic Integration. *J. Chem. Phys.* 2005, 122, 144107.
4. Onufriev, A.; Bashford, D.; Case, D. A. Exploring Protein Native States and Large-Scale Conformational Changes with a Modified Generalized Born Model. *Proteins: Struct., Funct., Genet.* 2004, 55, 383-394.
5. Weiser, J.; Shenkin, P.S.; Still, W.C. Approximate Atomic Surfaces from Linear Combinations of Pairwise Overlaps (LCPO). *J. Comput. Chem.*, 1999, 20, 217-230.
6. Onufriev, A.; Bashford, D.; Case, D. A. Modification of the generalized Born model suitable for macromolecules. *J. Phys. Chem. B*, 2000, 104, 3712-3720.
7. Jeziorski, B.; Moszynski, R.; Szalewicz, K. Perturbation Theory Approach to Intermolecular Potential Energy Surfaces of van der Waals Complexes. *Chem. Rev.* 1994, 94, 1887-1930.
8. Turney, J. M.; Simmonett, A. C.; Parrish, R. M.; Hohenstein, E. G.; Evangelista, F.; Fermann, J. T.; Mintz, B. J.; Burns, L. A.; Wilke, J. J.; Abrams, M. L.; Russ, N. J.; Leininger, M. L.; Janssen, C. L.; Seidl, E. T.; Allen, W. D.; Schaefer, H. F.; King, R. A.; Valeev, E. F.; Sherrill, C. D.; Crawford, T. D. Psi4: An open-source ab initio electronic structure program. *WIREs Comput. Mol. Sci.* 2012, 2, 556.
